# Supplementary material for: AMPK targets PDZD8 to trigger carbon source shift from glucose to glutamine
Source: PubMed Central journal article supplement (PMC11442470; doi:10.1038/s41422-024-00985-6), 2024-06-19

**Full scans.**

Blots, as shown in this figure, were cut into slices before incubation with primary antibodies. The Pierce™ Prestained Protein MW Marker, Cat. 26612, from ThermoFisher Scientific, was used as the protein marker.

**Fig. 1p**

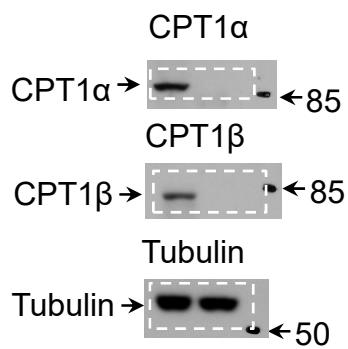

MEFs

**Fig. 2a left**

**Fig. 2a right**

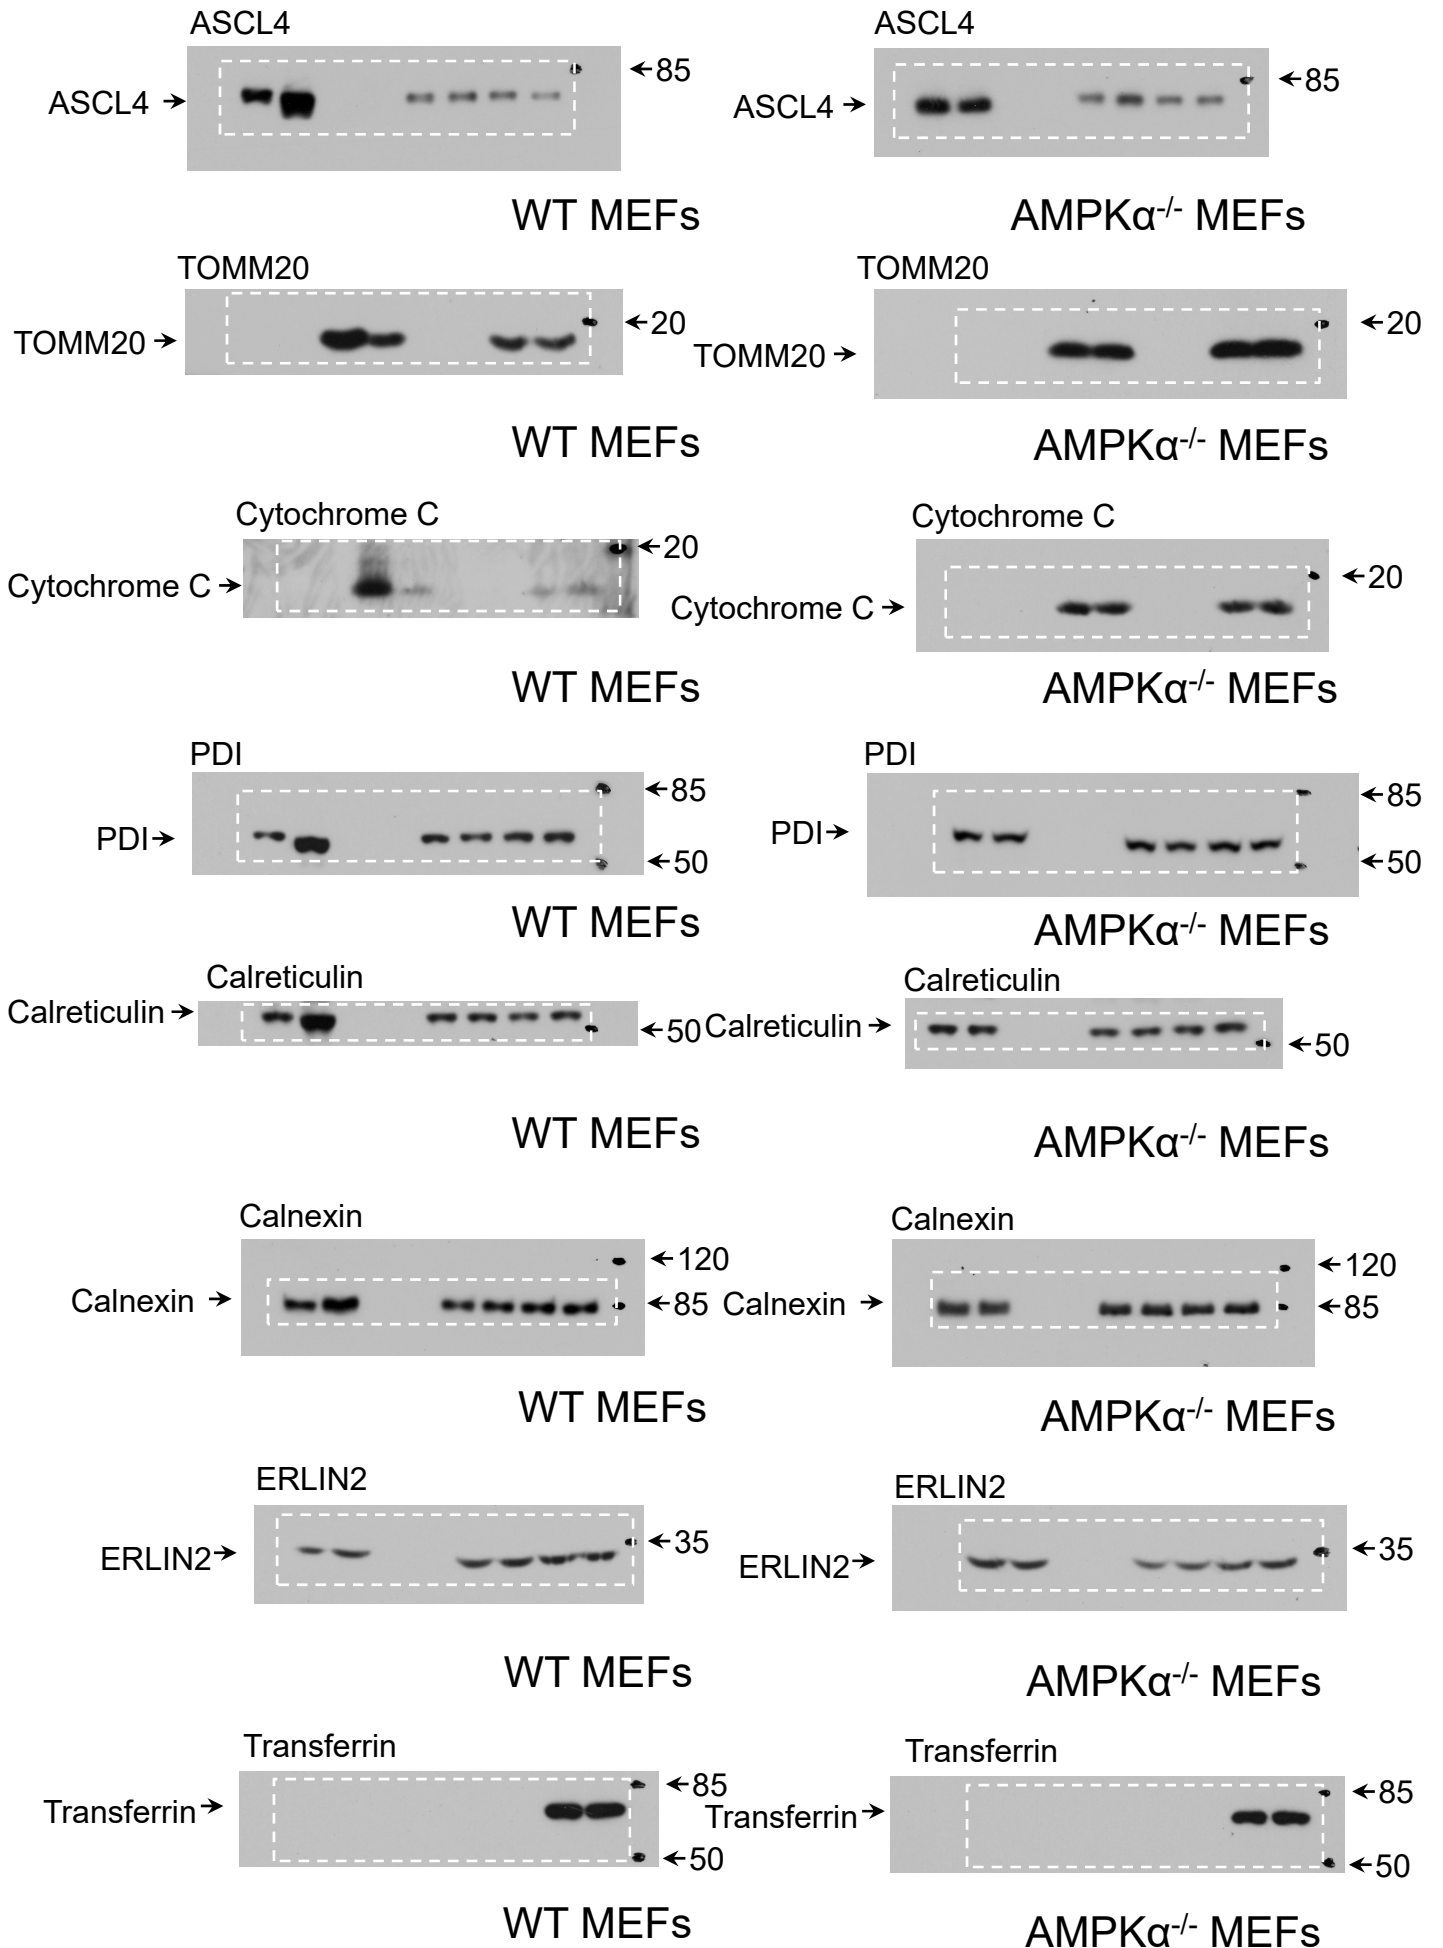

**Fig. 2c**

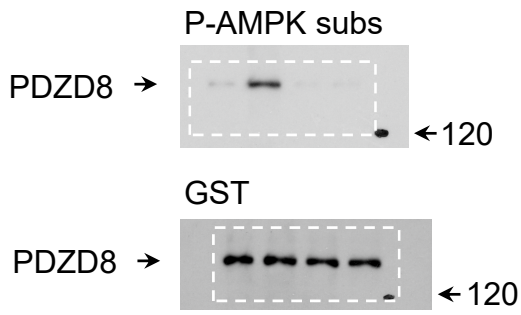

In vitro kinase assay

**Fig. 2d**

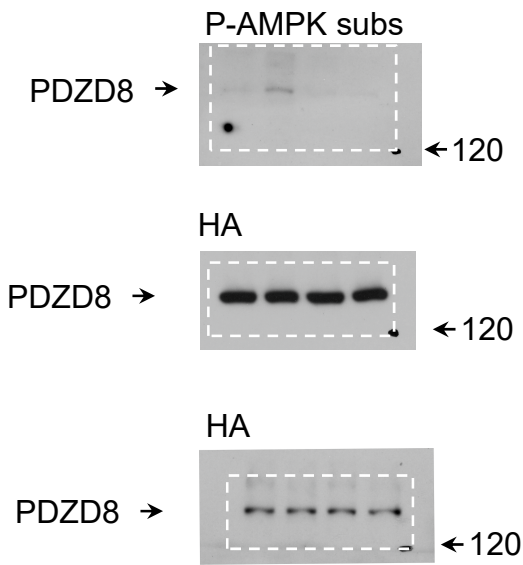

IP

*PDZD8*<sup>-/-</sup> MEFs

Total cell lysis

**Fig. 2e**

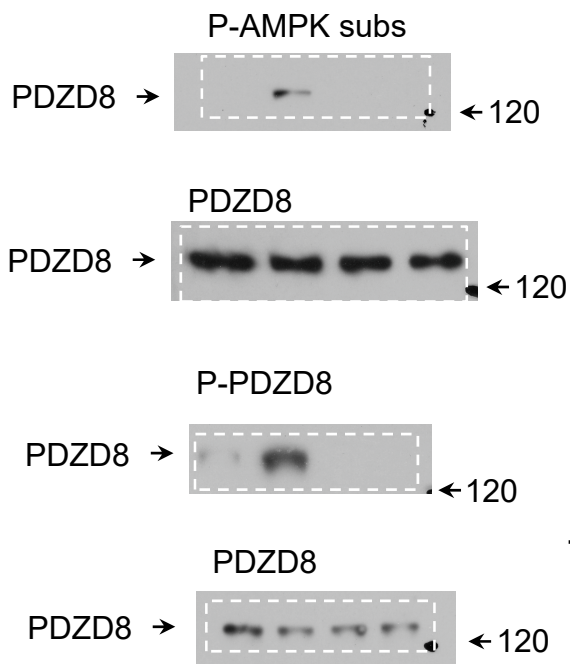

IP

*AMPKα*<sup>-/-</sup> MEFs

Total cell lysis

**Fig. 2f**

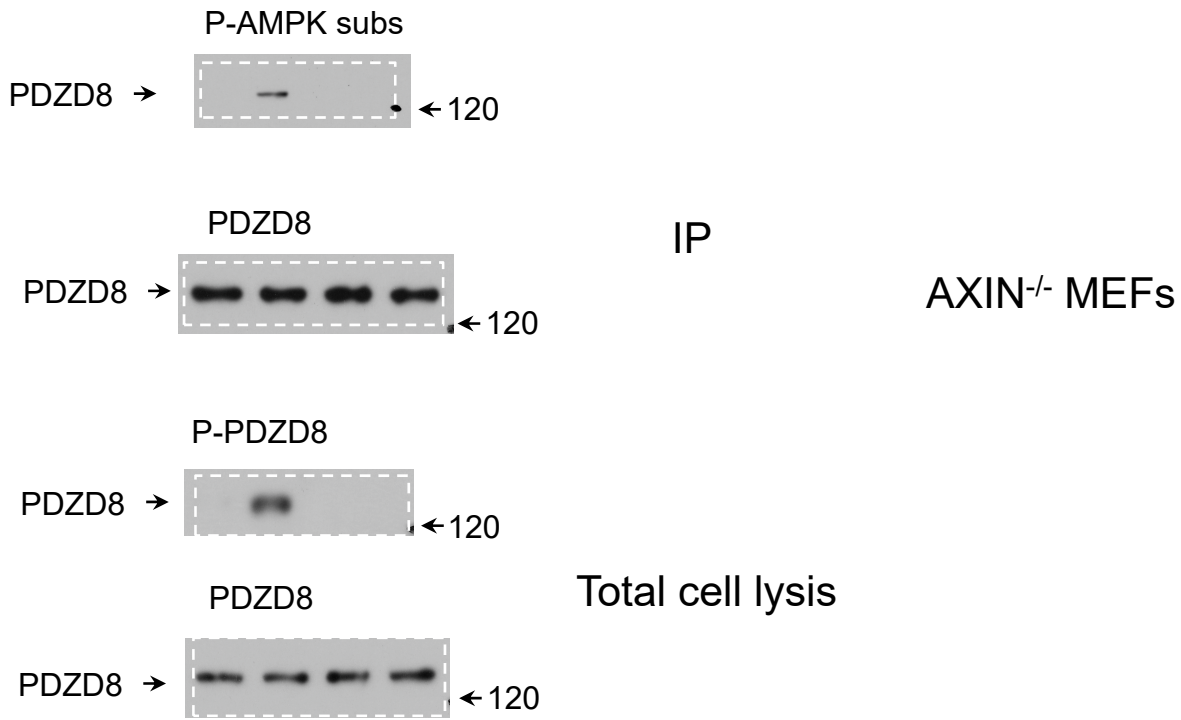

**Fig. 2g**

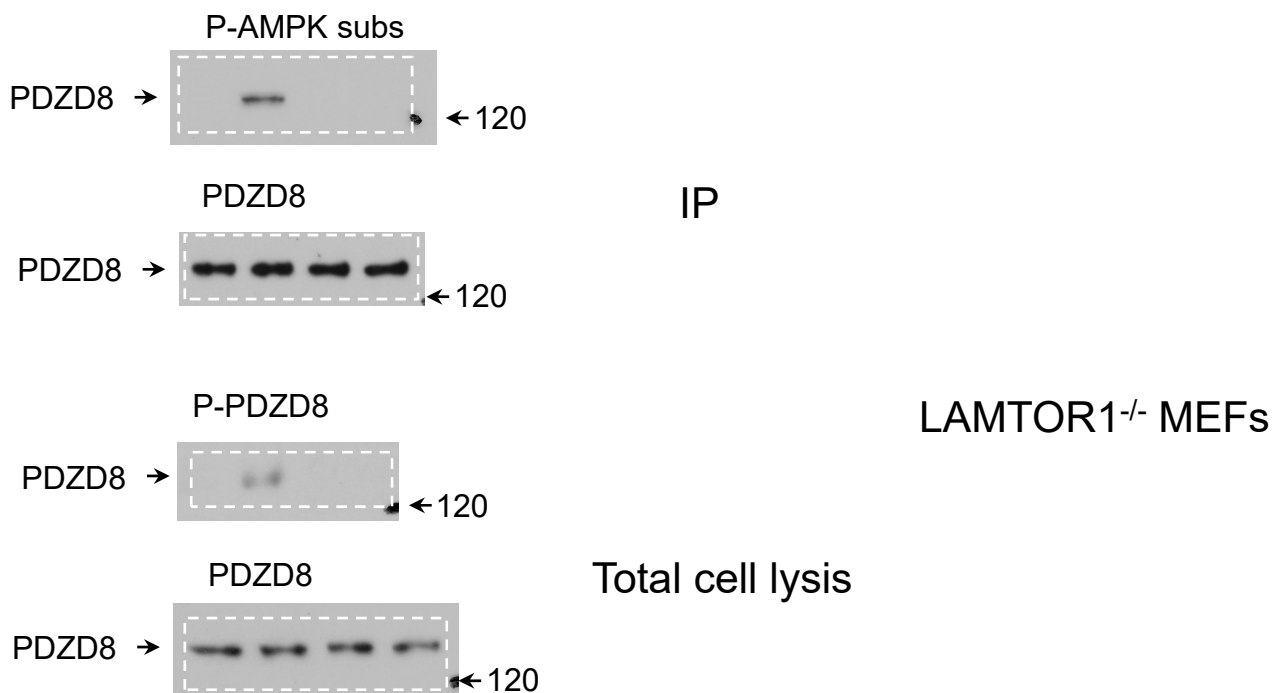

**Fig. 3J**

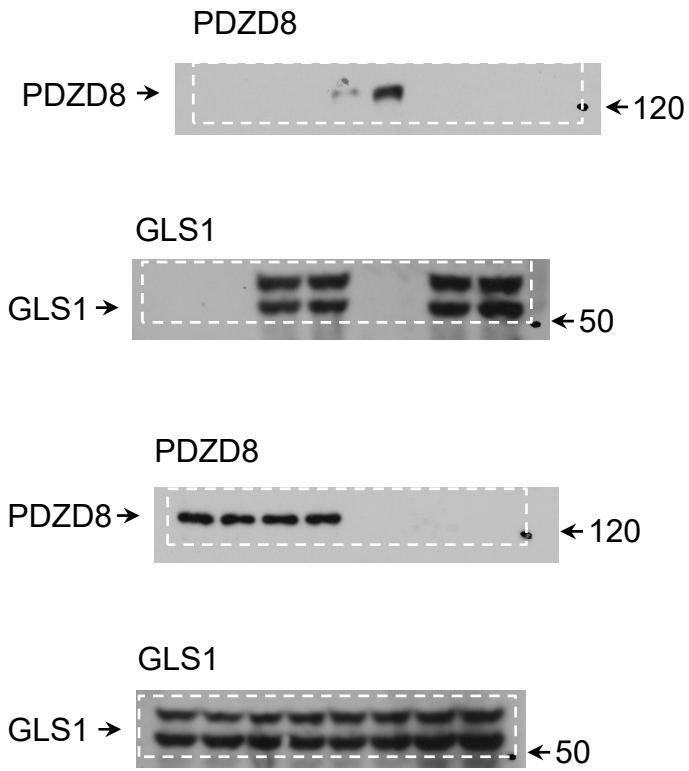

IP

Total cell lysis

*PDZD8*<sup>-/-</sup> MEFs

**Fig. 3n**

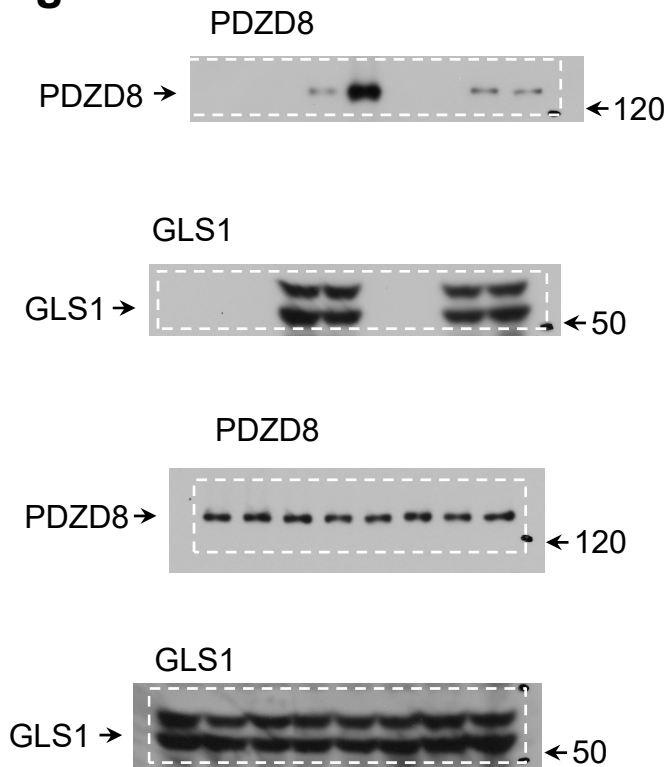

IP

Total cell lysis

*AMPKα*<sup>-/-</sup> MEFs

**Fig. 3o**

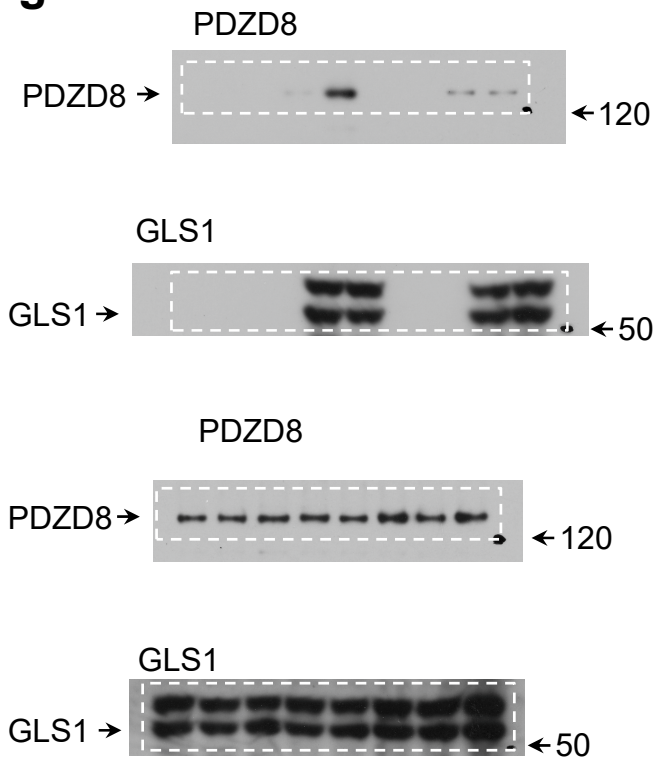

IP

Total cell lysis

*PDZD8*<sup>-/-</sup> MEFs

**Fig. 3r up**

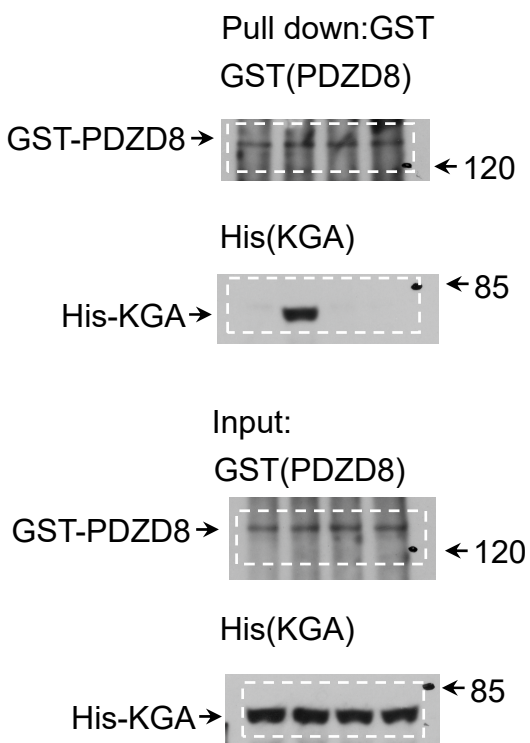

**Fig. 3p bottom**

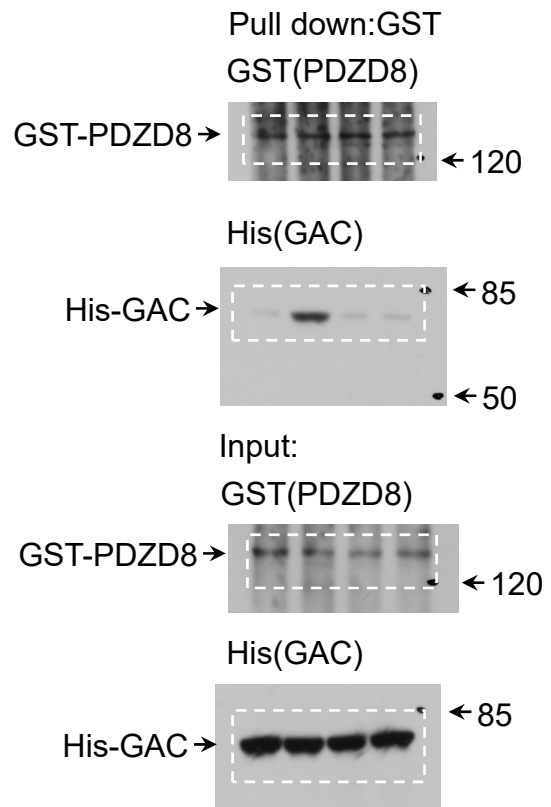

**Fig. 4e**

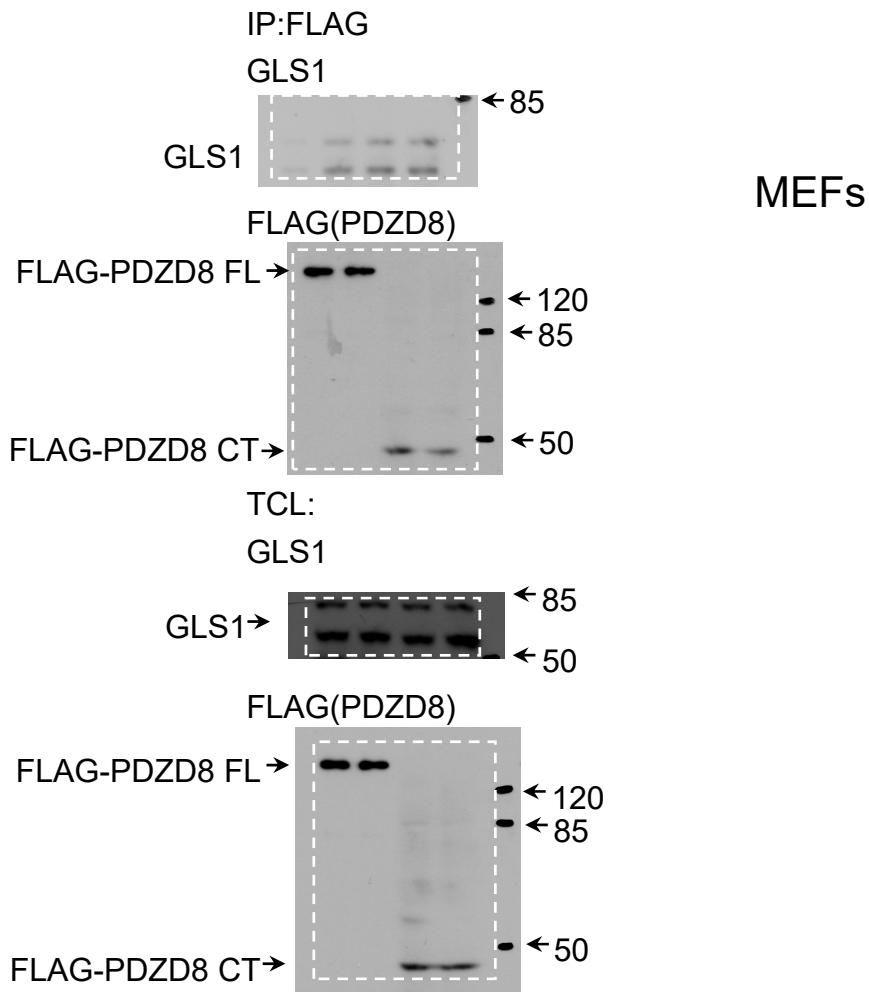

**Fig. 5f**

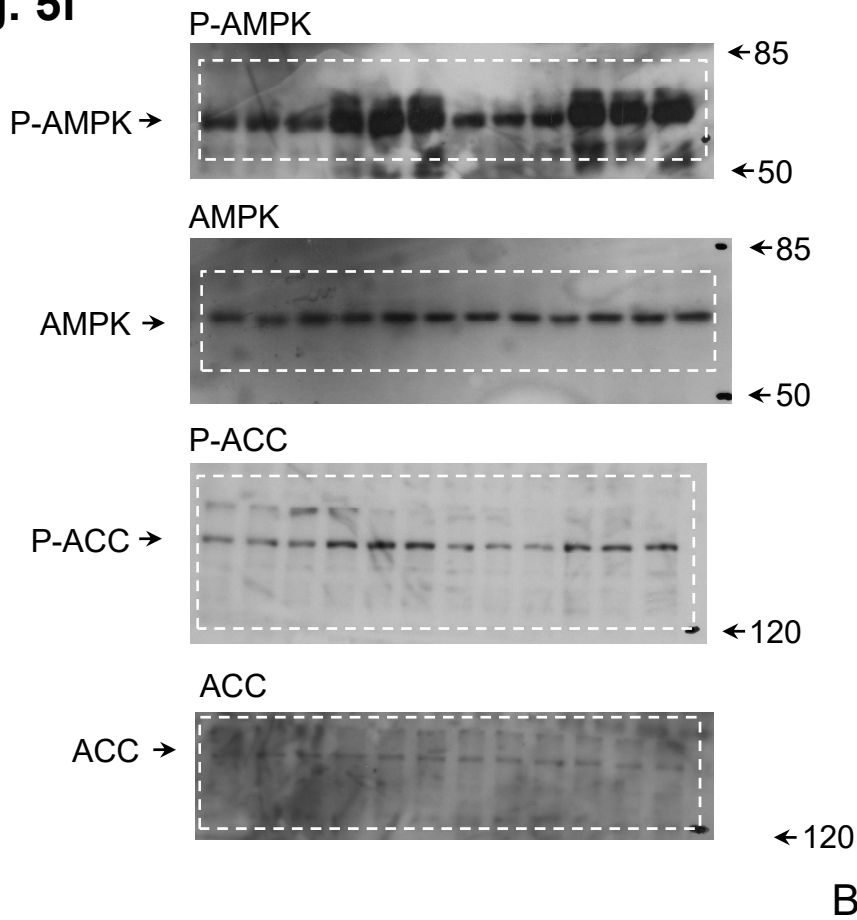

**Fig. S1a**

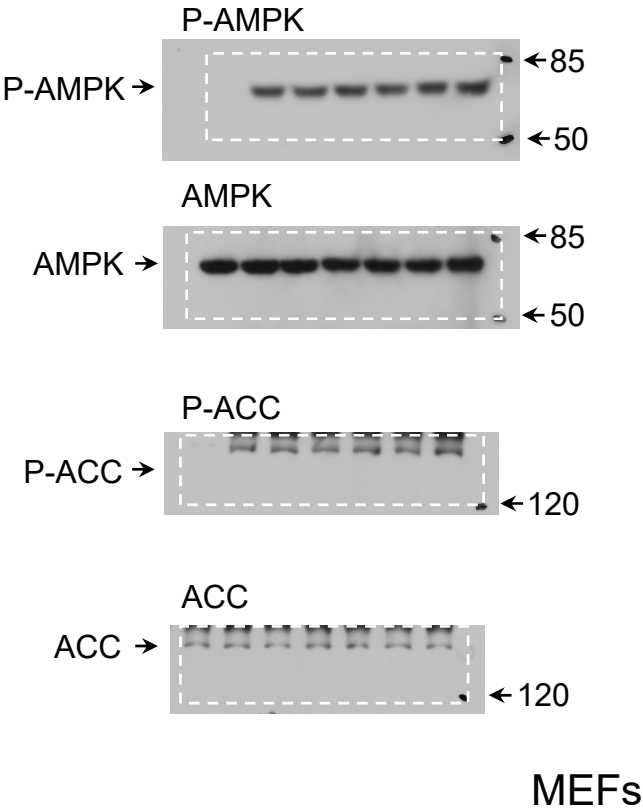



**Fig. S3a left**

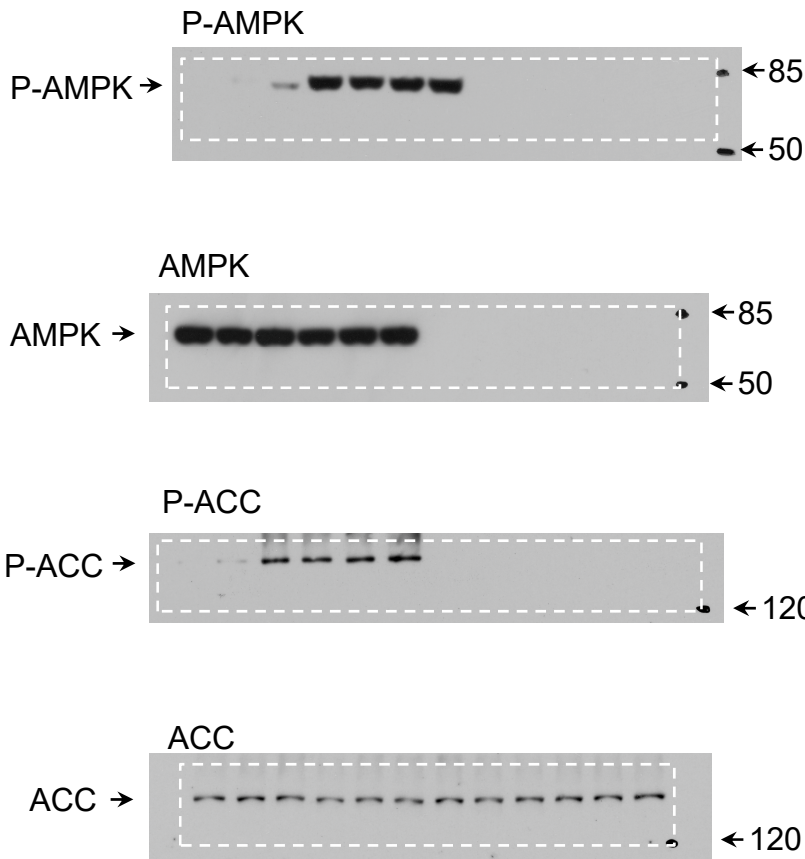

Muscle

**Fig. S3a right**

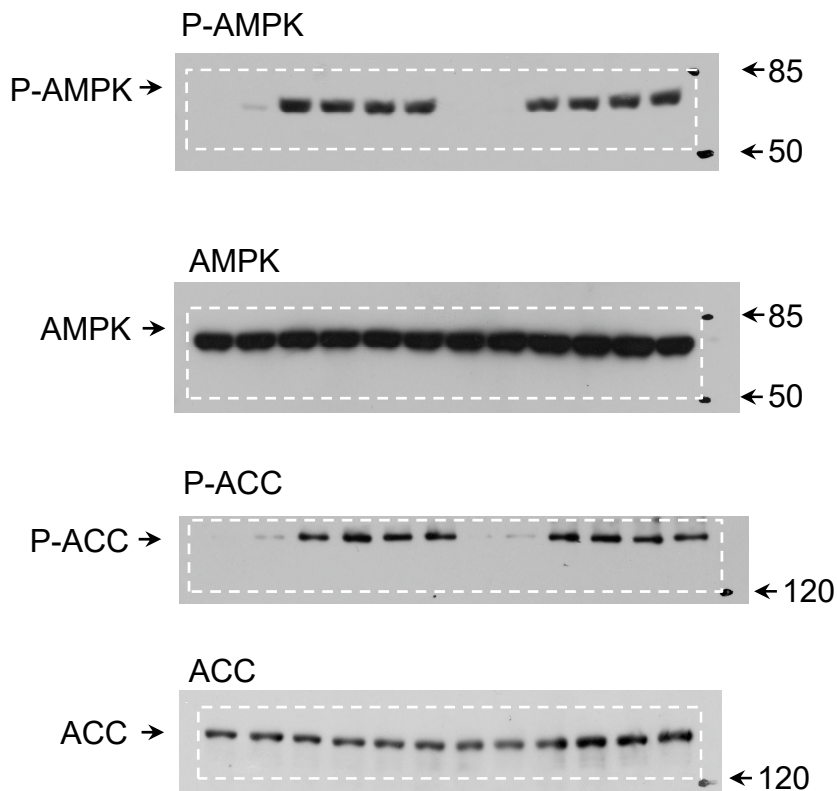

Liver

**Fig. S3g left**

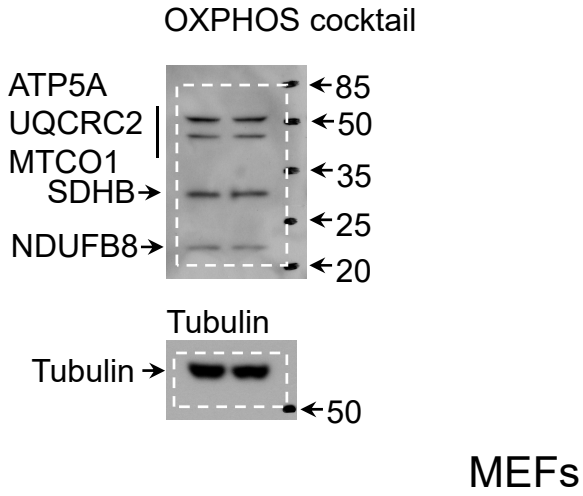

**Fig. S3g right**

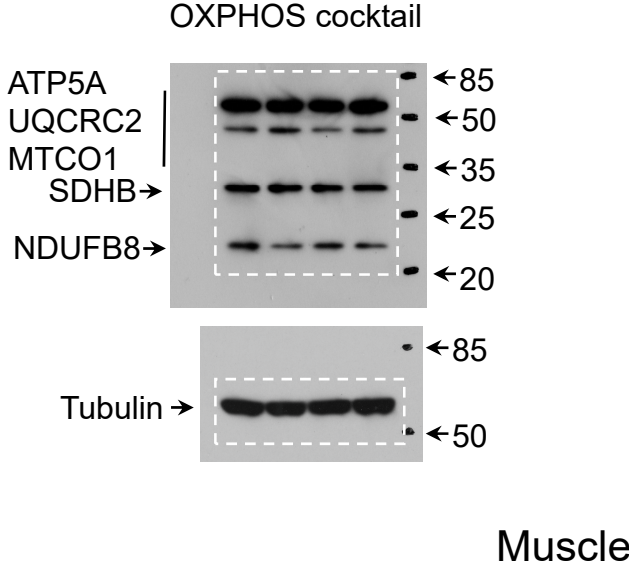

**Fig. S4a**

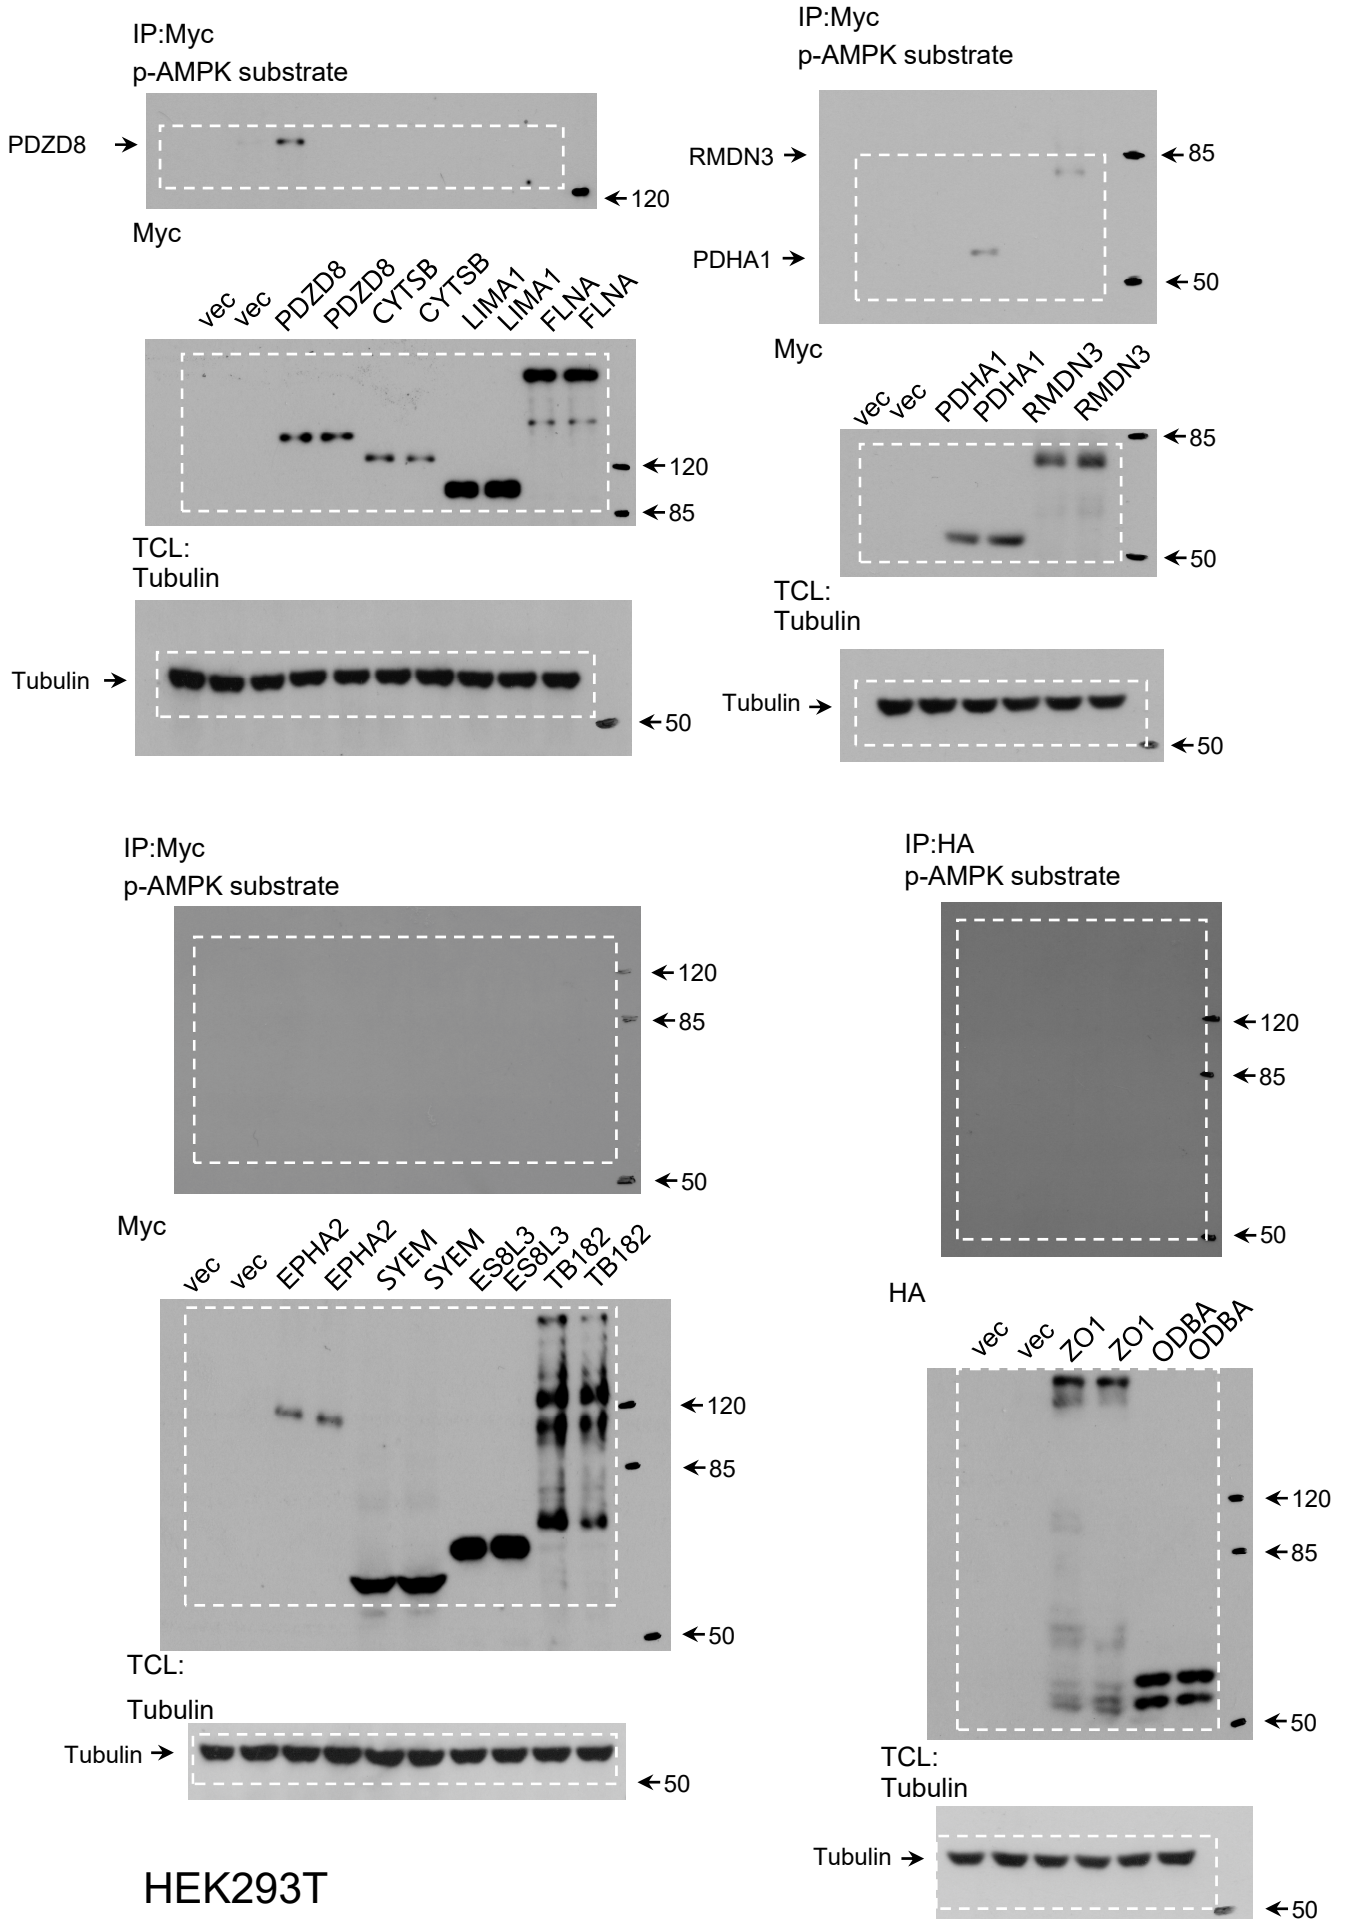

**Fig. S4a**

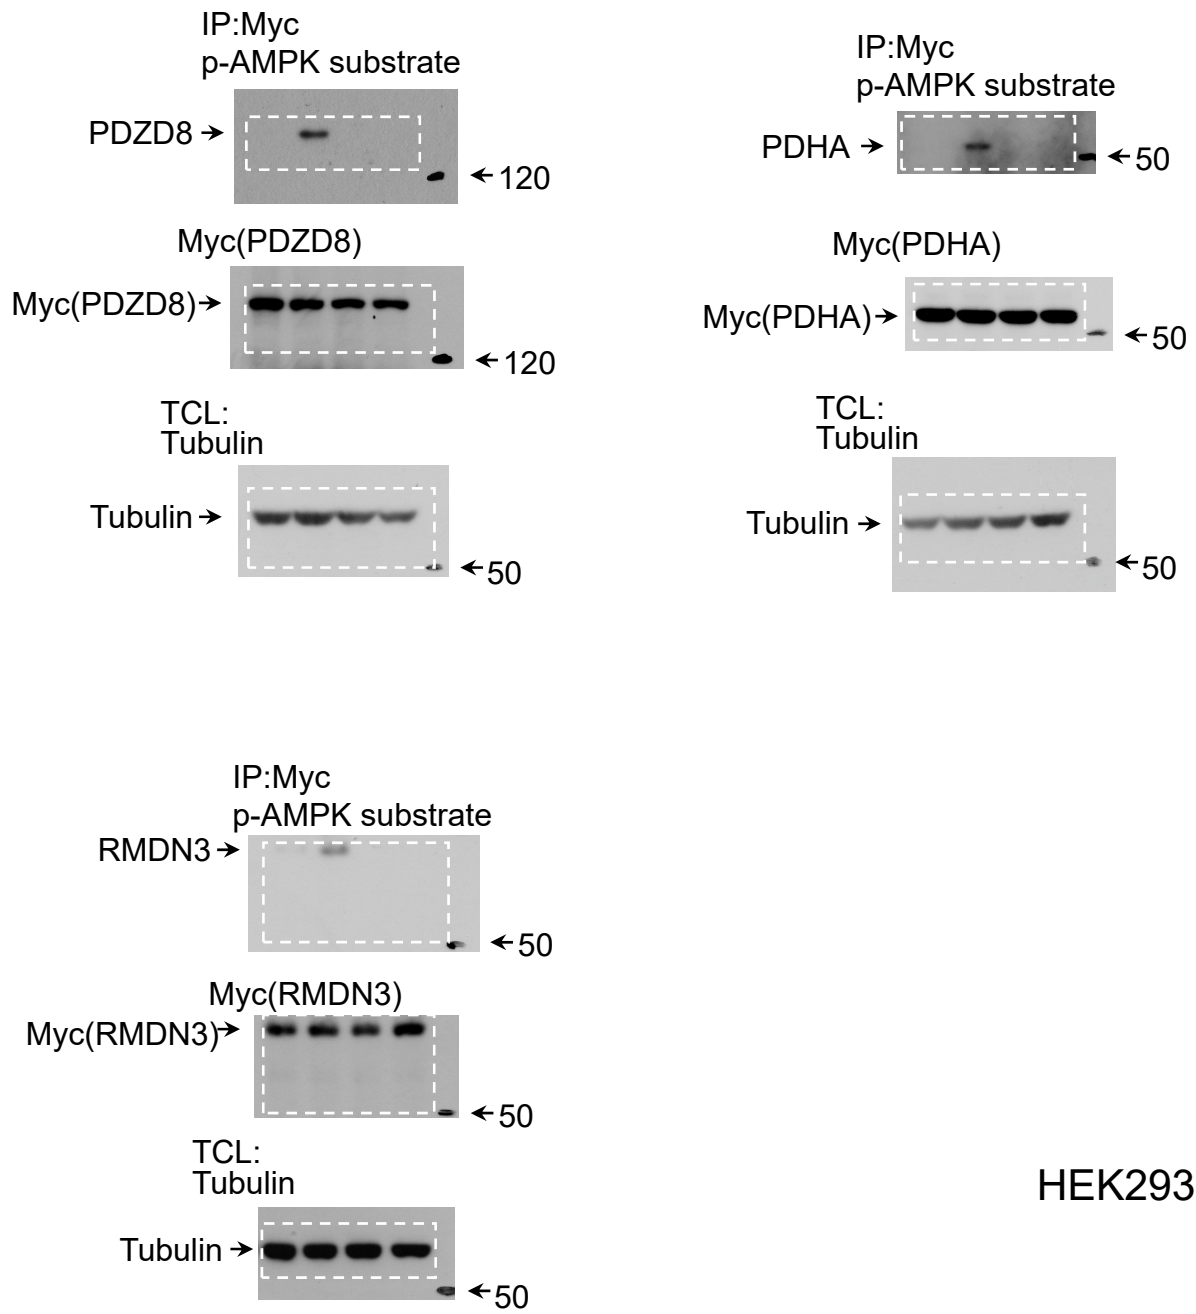

**Fig. S4b left**

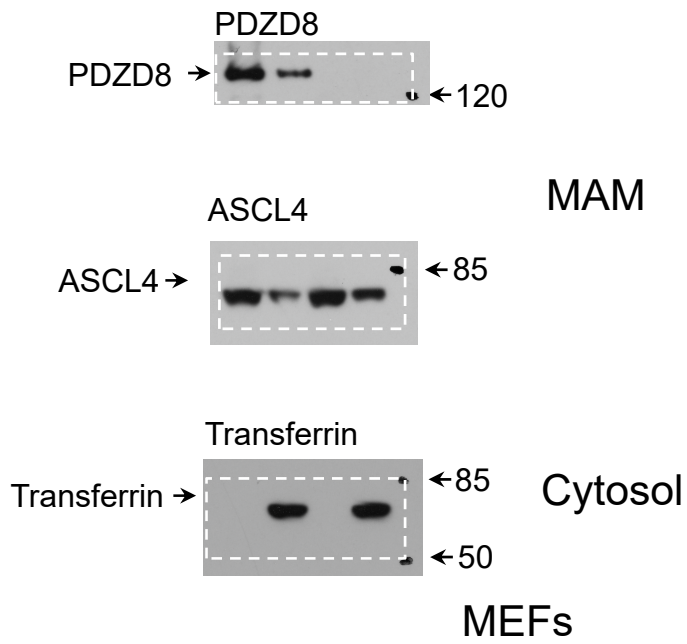

**Fig. S4b middle**

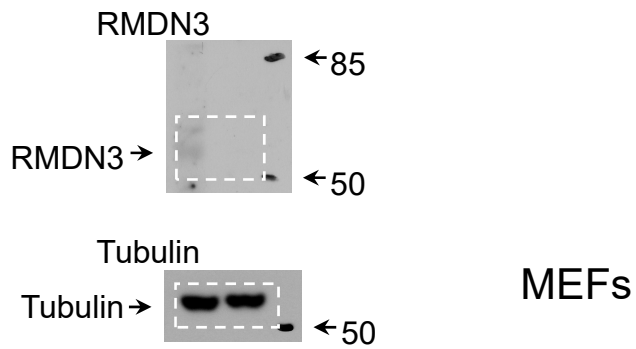

**Fig. S4b right**

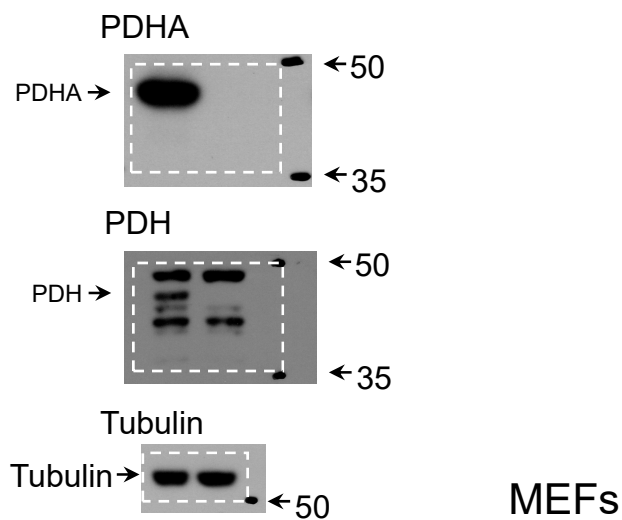

**Fig. S4g**

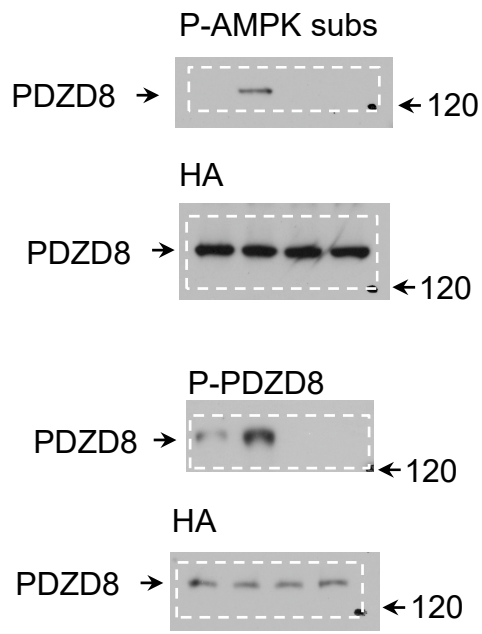

IP

Total cell lysis

*PDZD8*<sup>-/-</sup> MEFs

**Fig. S5c left**

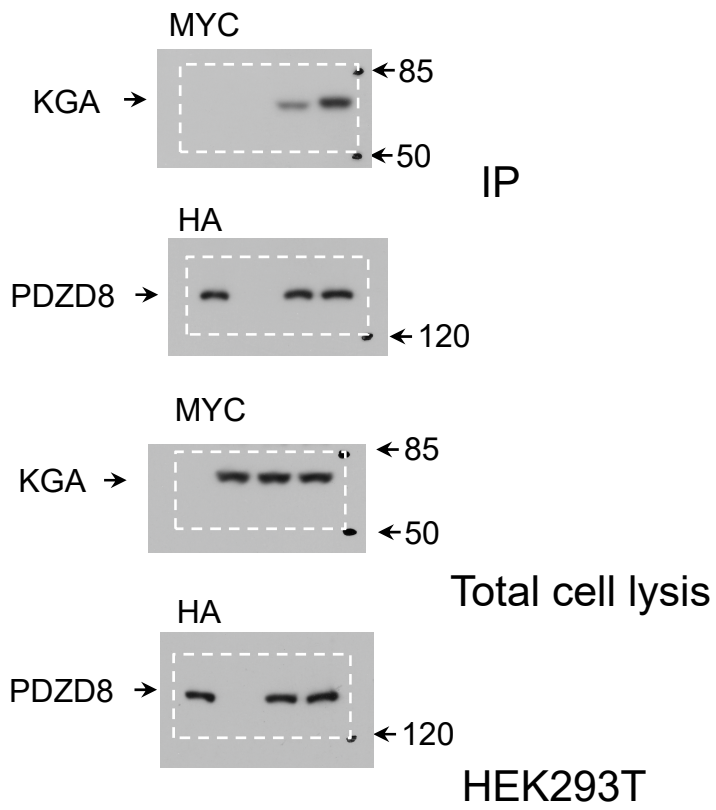

**Fig. S5c right**

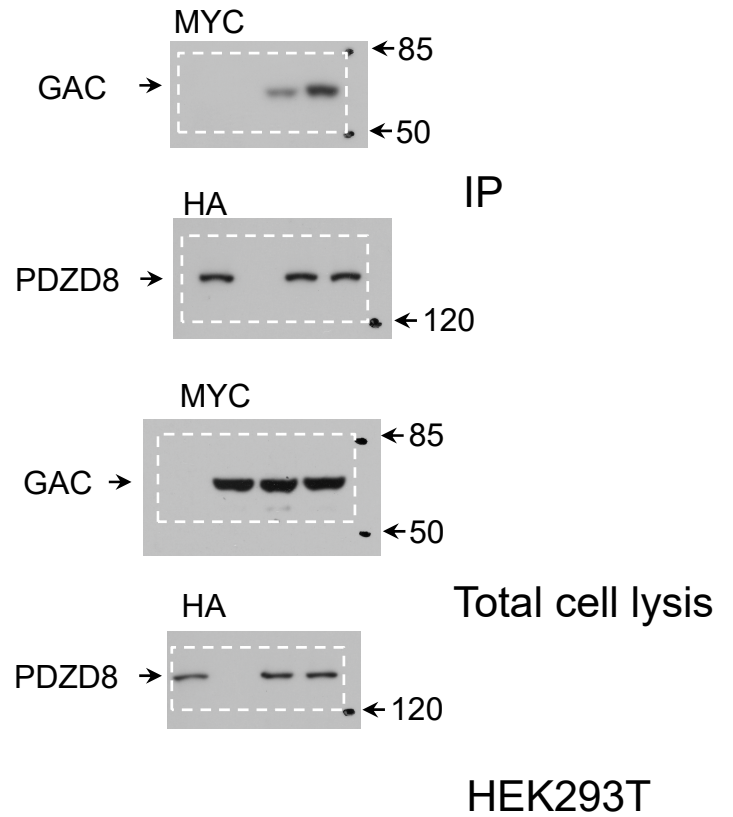

**Fig. S5d up**

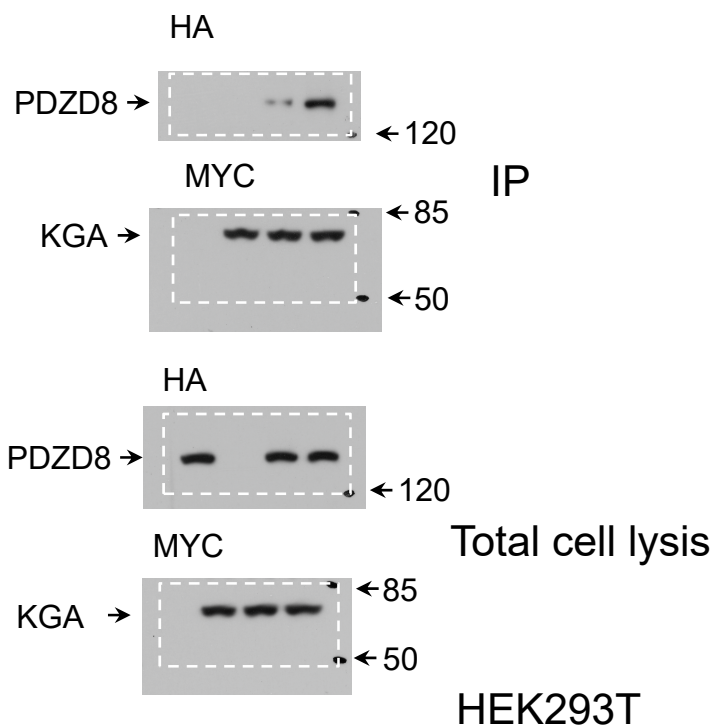

**Fig. S5d bottom**

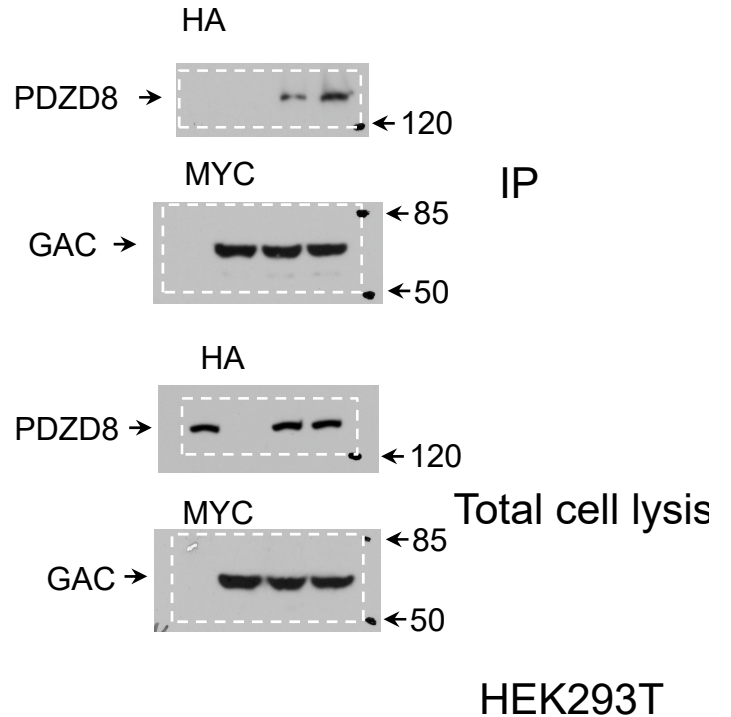

**Fig. S5f left**

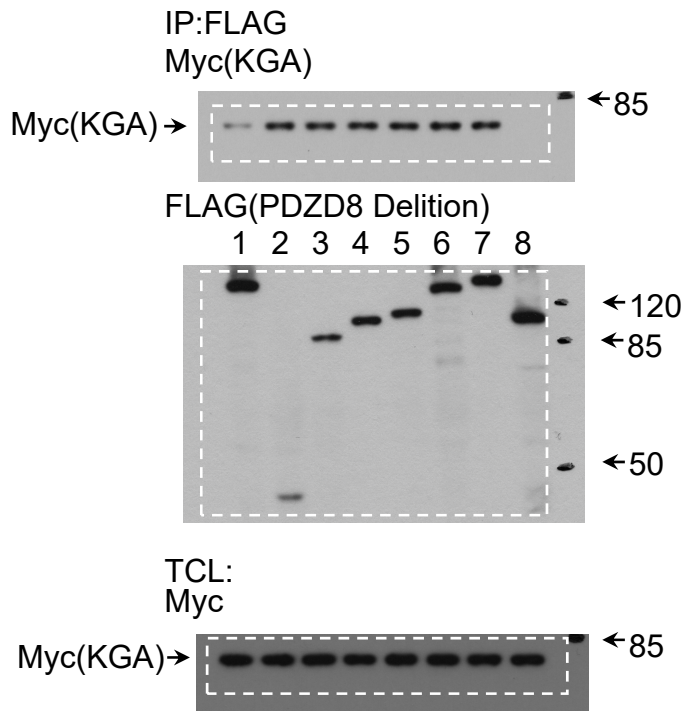

HEK293T

**Fig. S5f right**

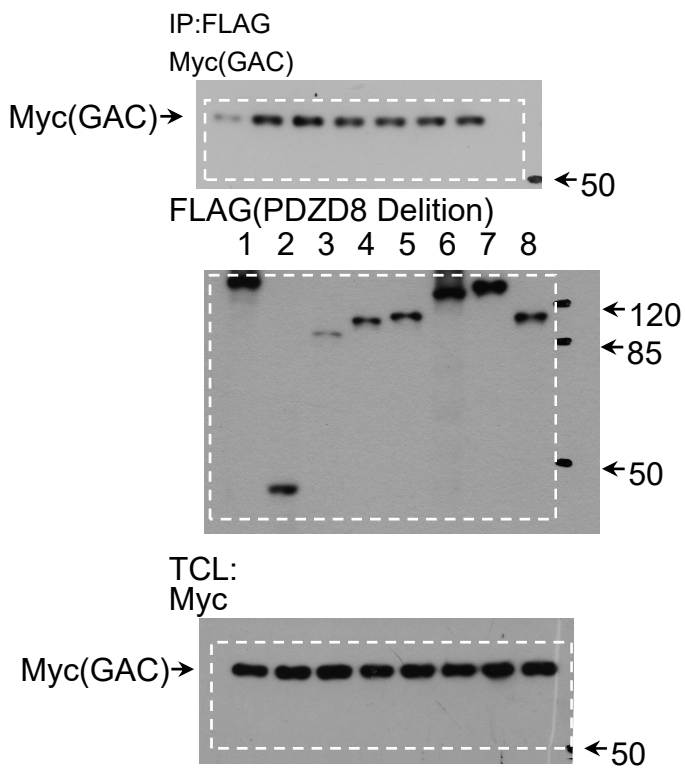

HEK293T



**Fig. S5h up**

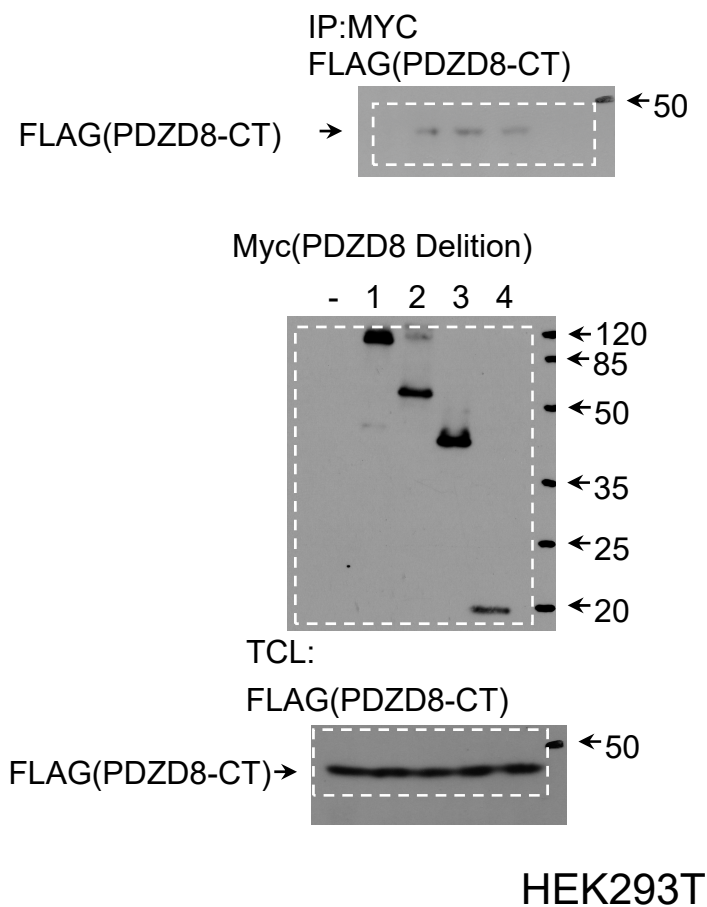

**Fig. S5h middle**

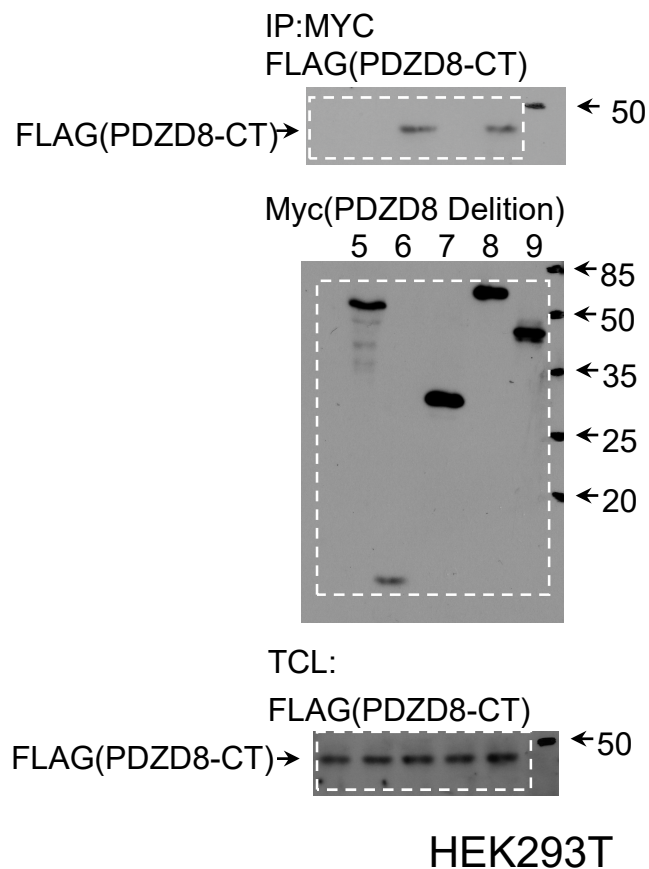

**Fig. S5h bottom**

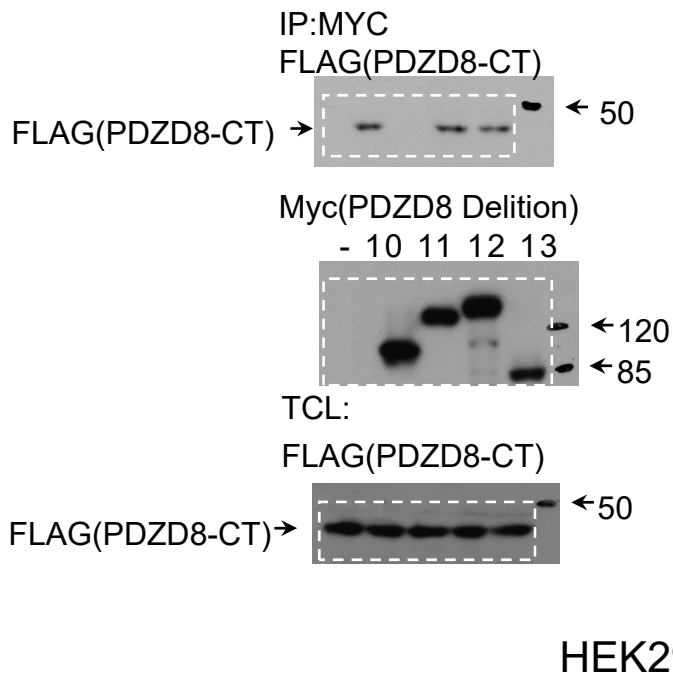

### Fig. S5i up

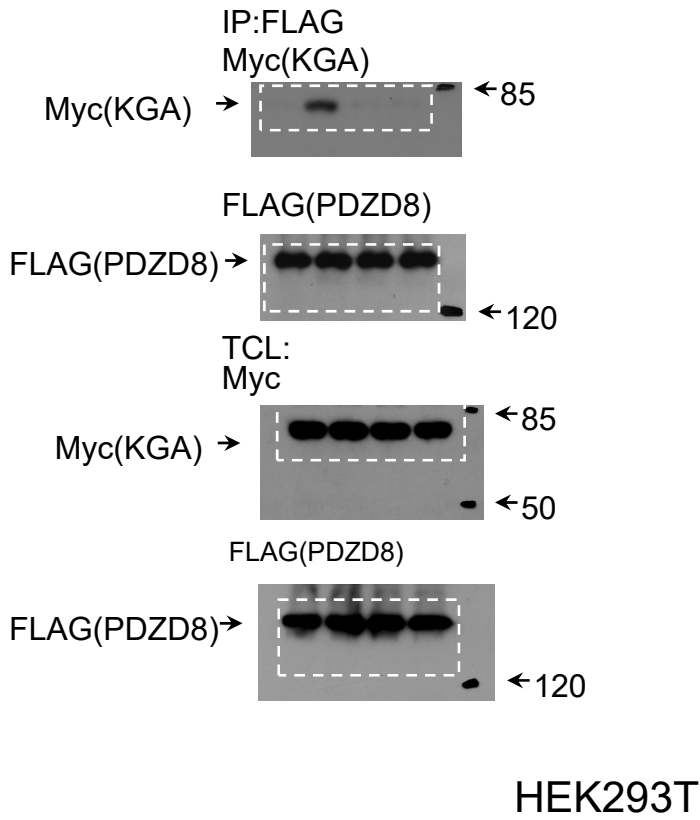

### Fig. S5i bottom

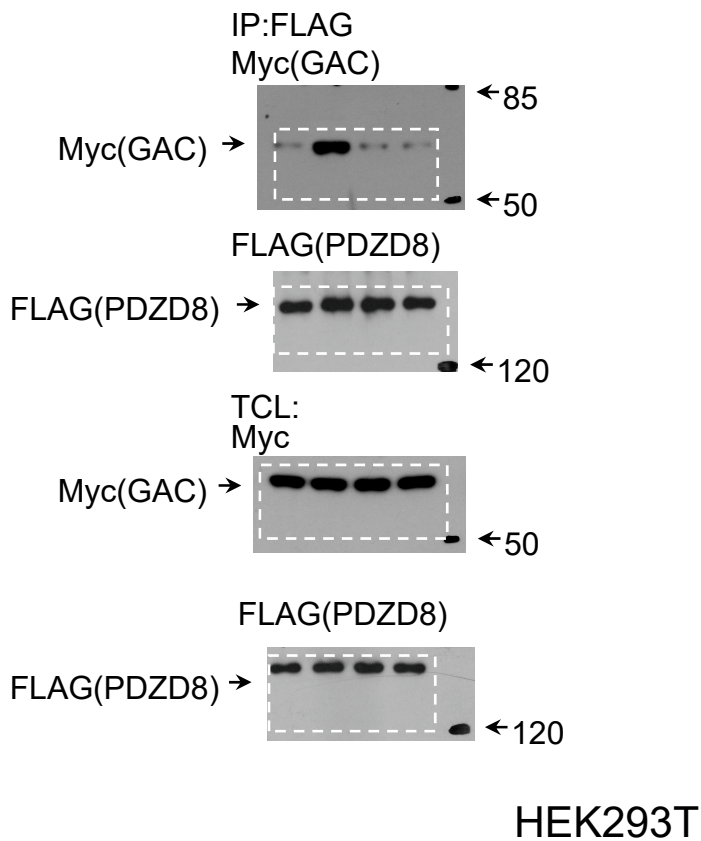

**Fig. S6b (up)**

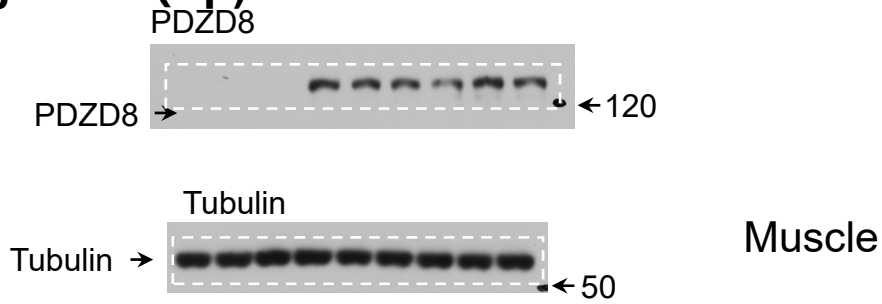

**Fig. S6b(down)**

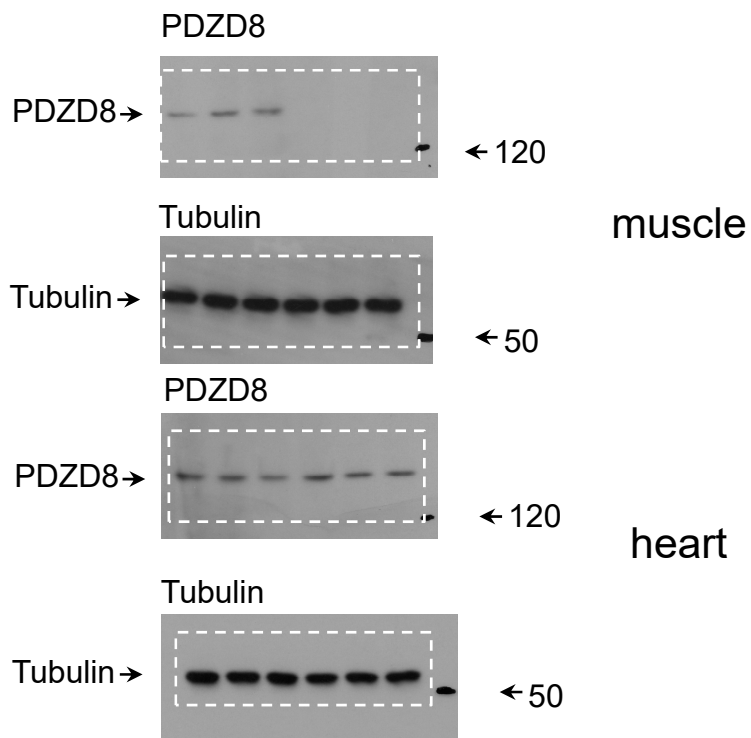

**Fig. S7a**

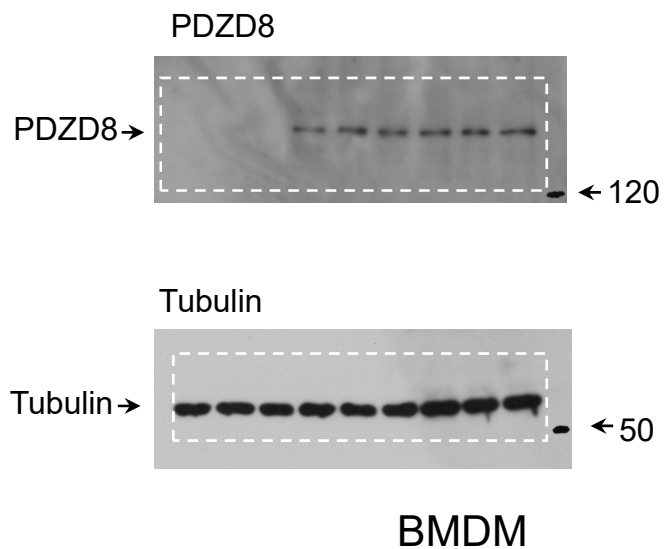

**Fig. S7k left**

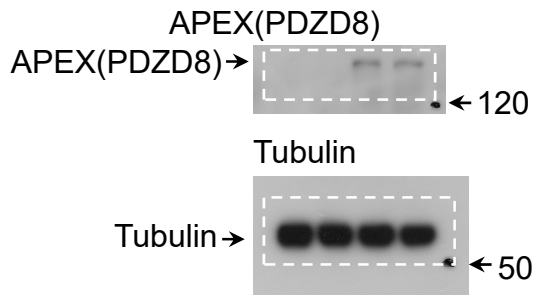

**Fig. S7k right**

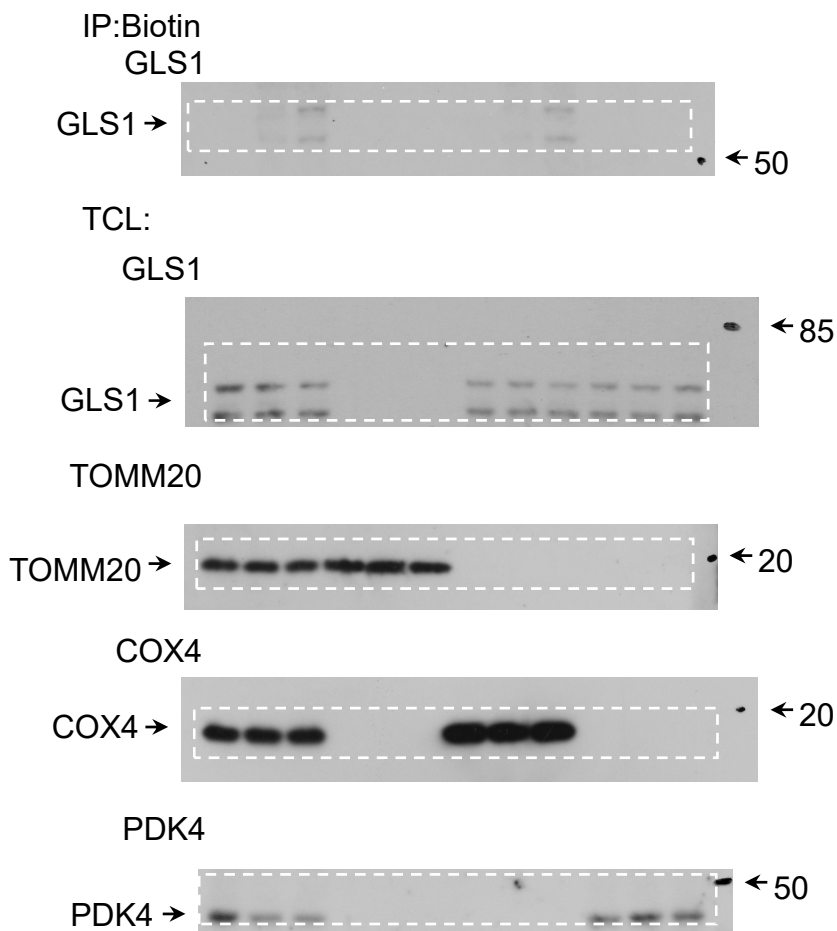

MEFs

**Fig. S7j**

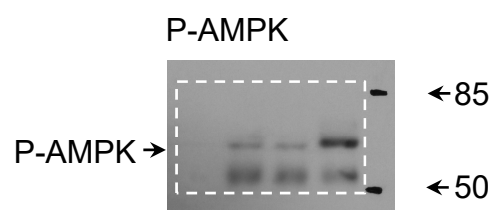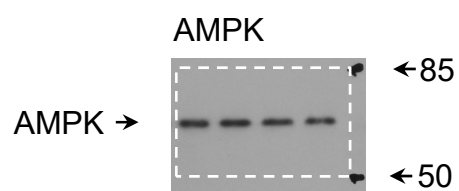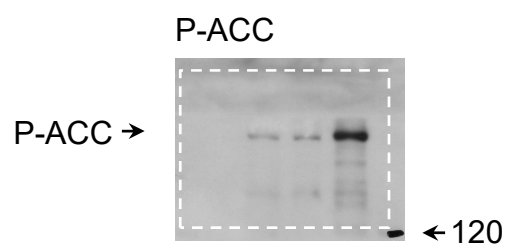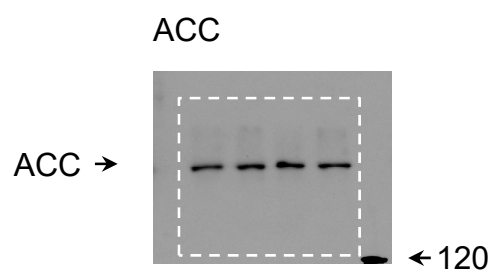

MEFs

**Fig. S7I left**

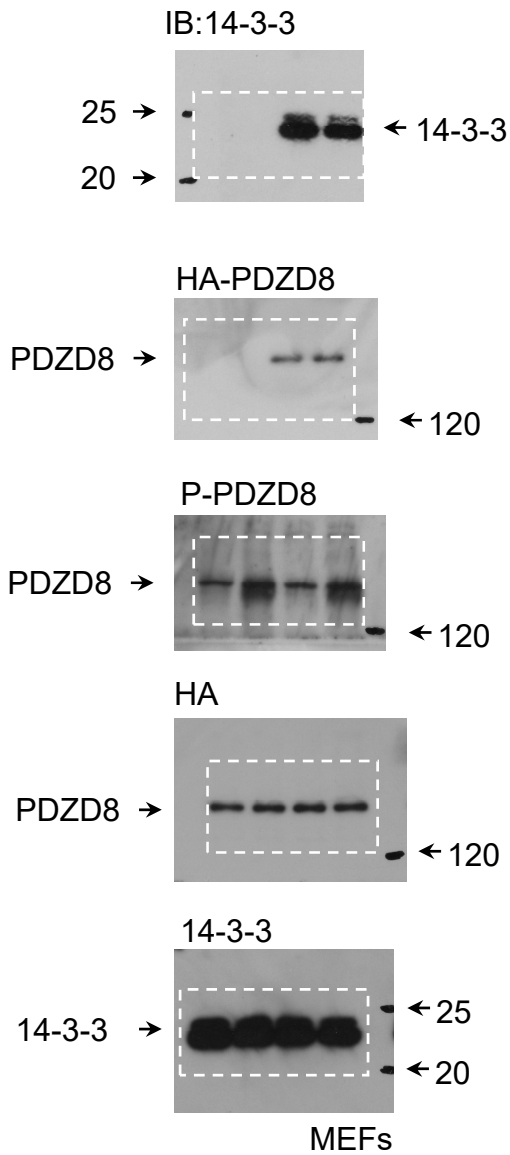

**Fig. S7I right**

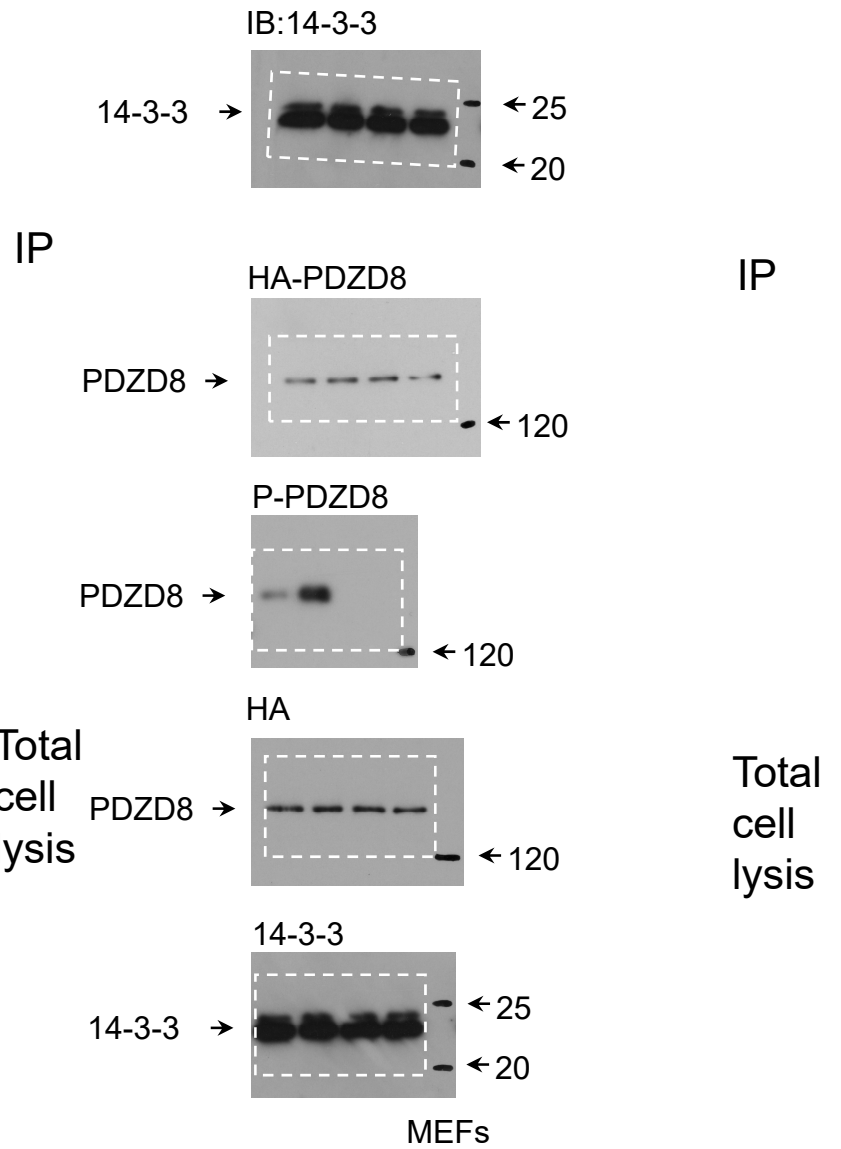

Supplement: 41422_2024_985_MOESM12_ESM.pdf [file 41422_2024_985_MOESM12_ESM.pdf]
