# Supplementary material for: AMPK targets PDZD8 to trigger carbon source shift from glucose to glutamine
Source: PubMed Central journal article supplement (PMC11442470; doi:10.1038/s41422-024-00985-6), 2024-06-19
Supplement: 41422_2024_985_MOESM2_ESM.pdf [file 41422_2024_985_MOESM2_ESM.pdf]

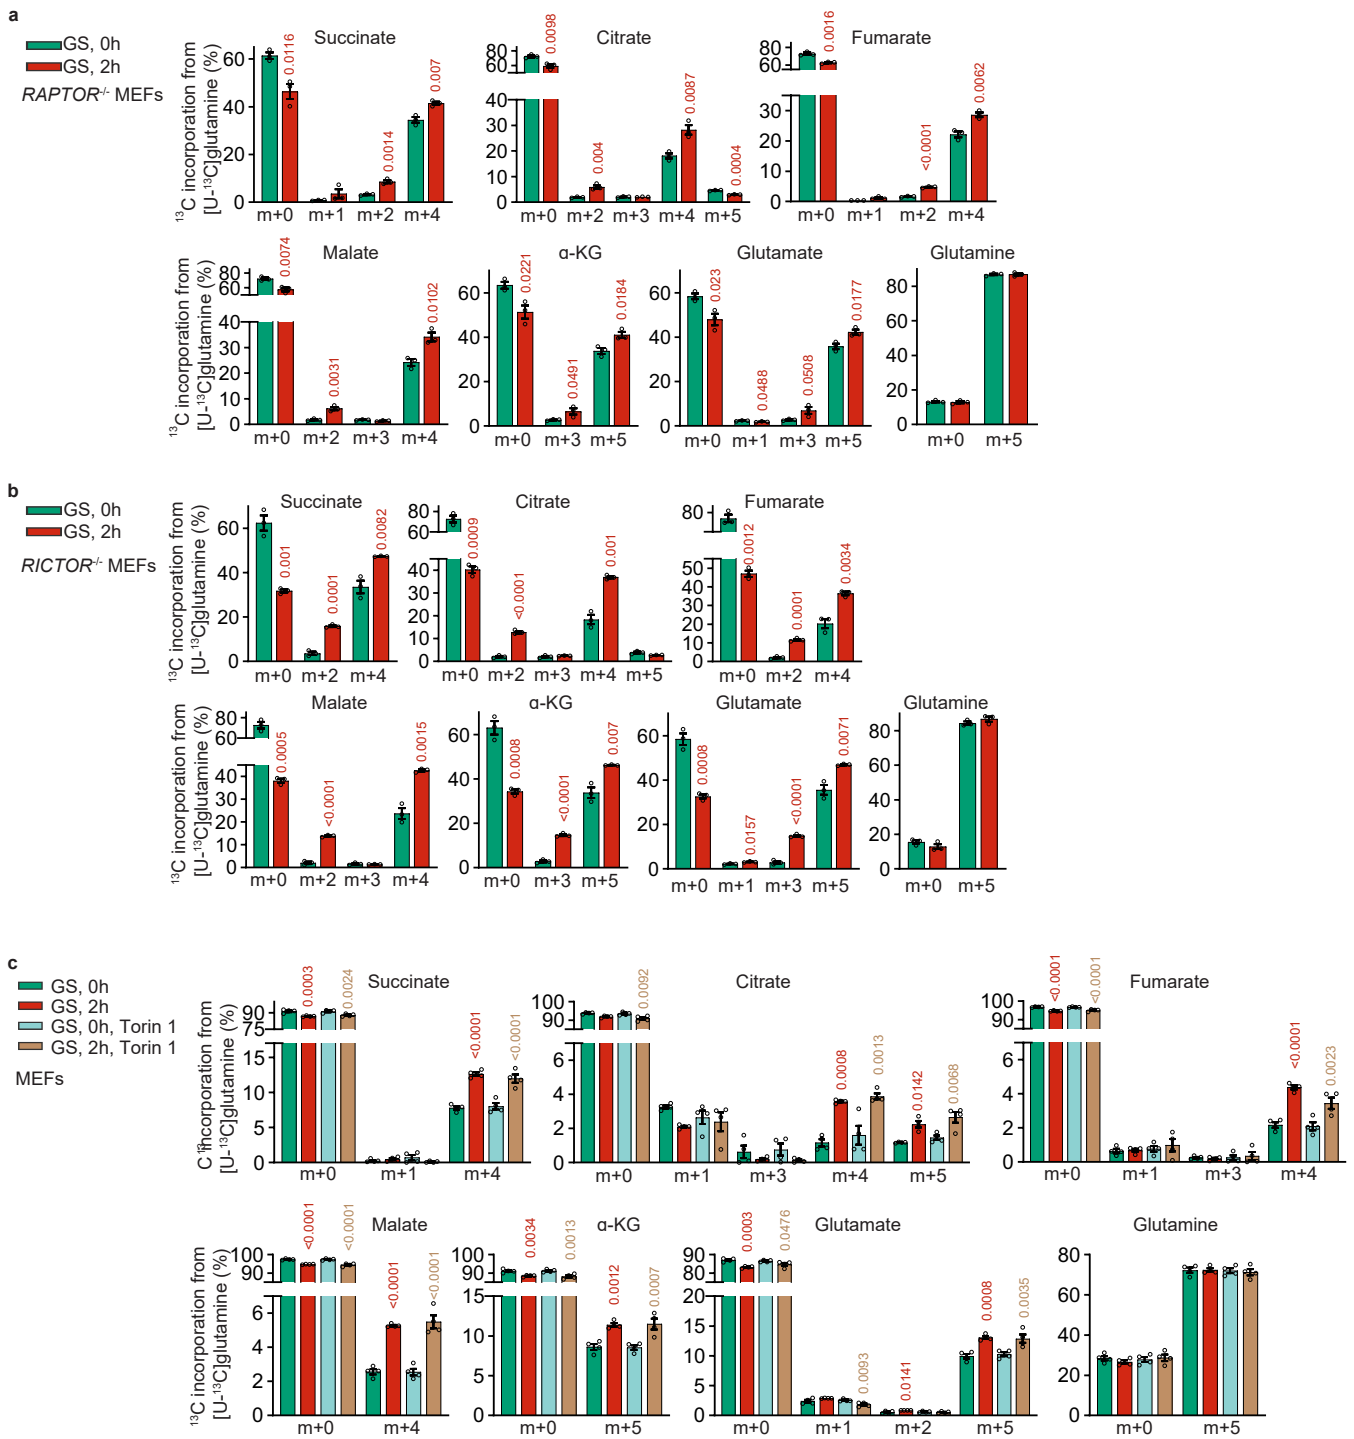

**Supplementary information Fig. S2 mTOR is not required for the promotion of glutamine utilization in low glucose**

**a-c** *RAPTOR*<sup>-/-</sup> MEFs (a), *RICTOR*<sup>-/-</sup> MEFs (b) or wildtype MEFs incubated in 10 nM Torin 1 (c) were starved for glucose for 2 h, followed by determination of glutamine utilization as in Fig. 1a. Data are shown as mean ± SEM; n = 4 (c) or 3 (others) for each condition; p values were determined by two-way ANOVA, followed by Sidak (c) or by unpaired two-tailed Student's *t*-test (others).

Experiments in this figure were performed three times.
