# Supplementary material for: AMPK targets PDZD8 to trigger carbon source shift from glucose to glutamine
Source: PubMed Central journal article supplement (PMC11442470; doi:10.1038/s41422-024-00985-6), 2024-06-19
Supplement: 41422_2024_985_MOESM6_ESM.pdf [file 41422_2024_985_MOESM6_ESM.pdf]

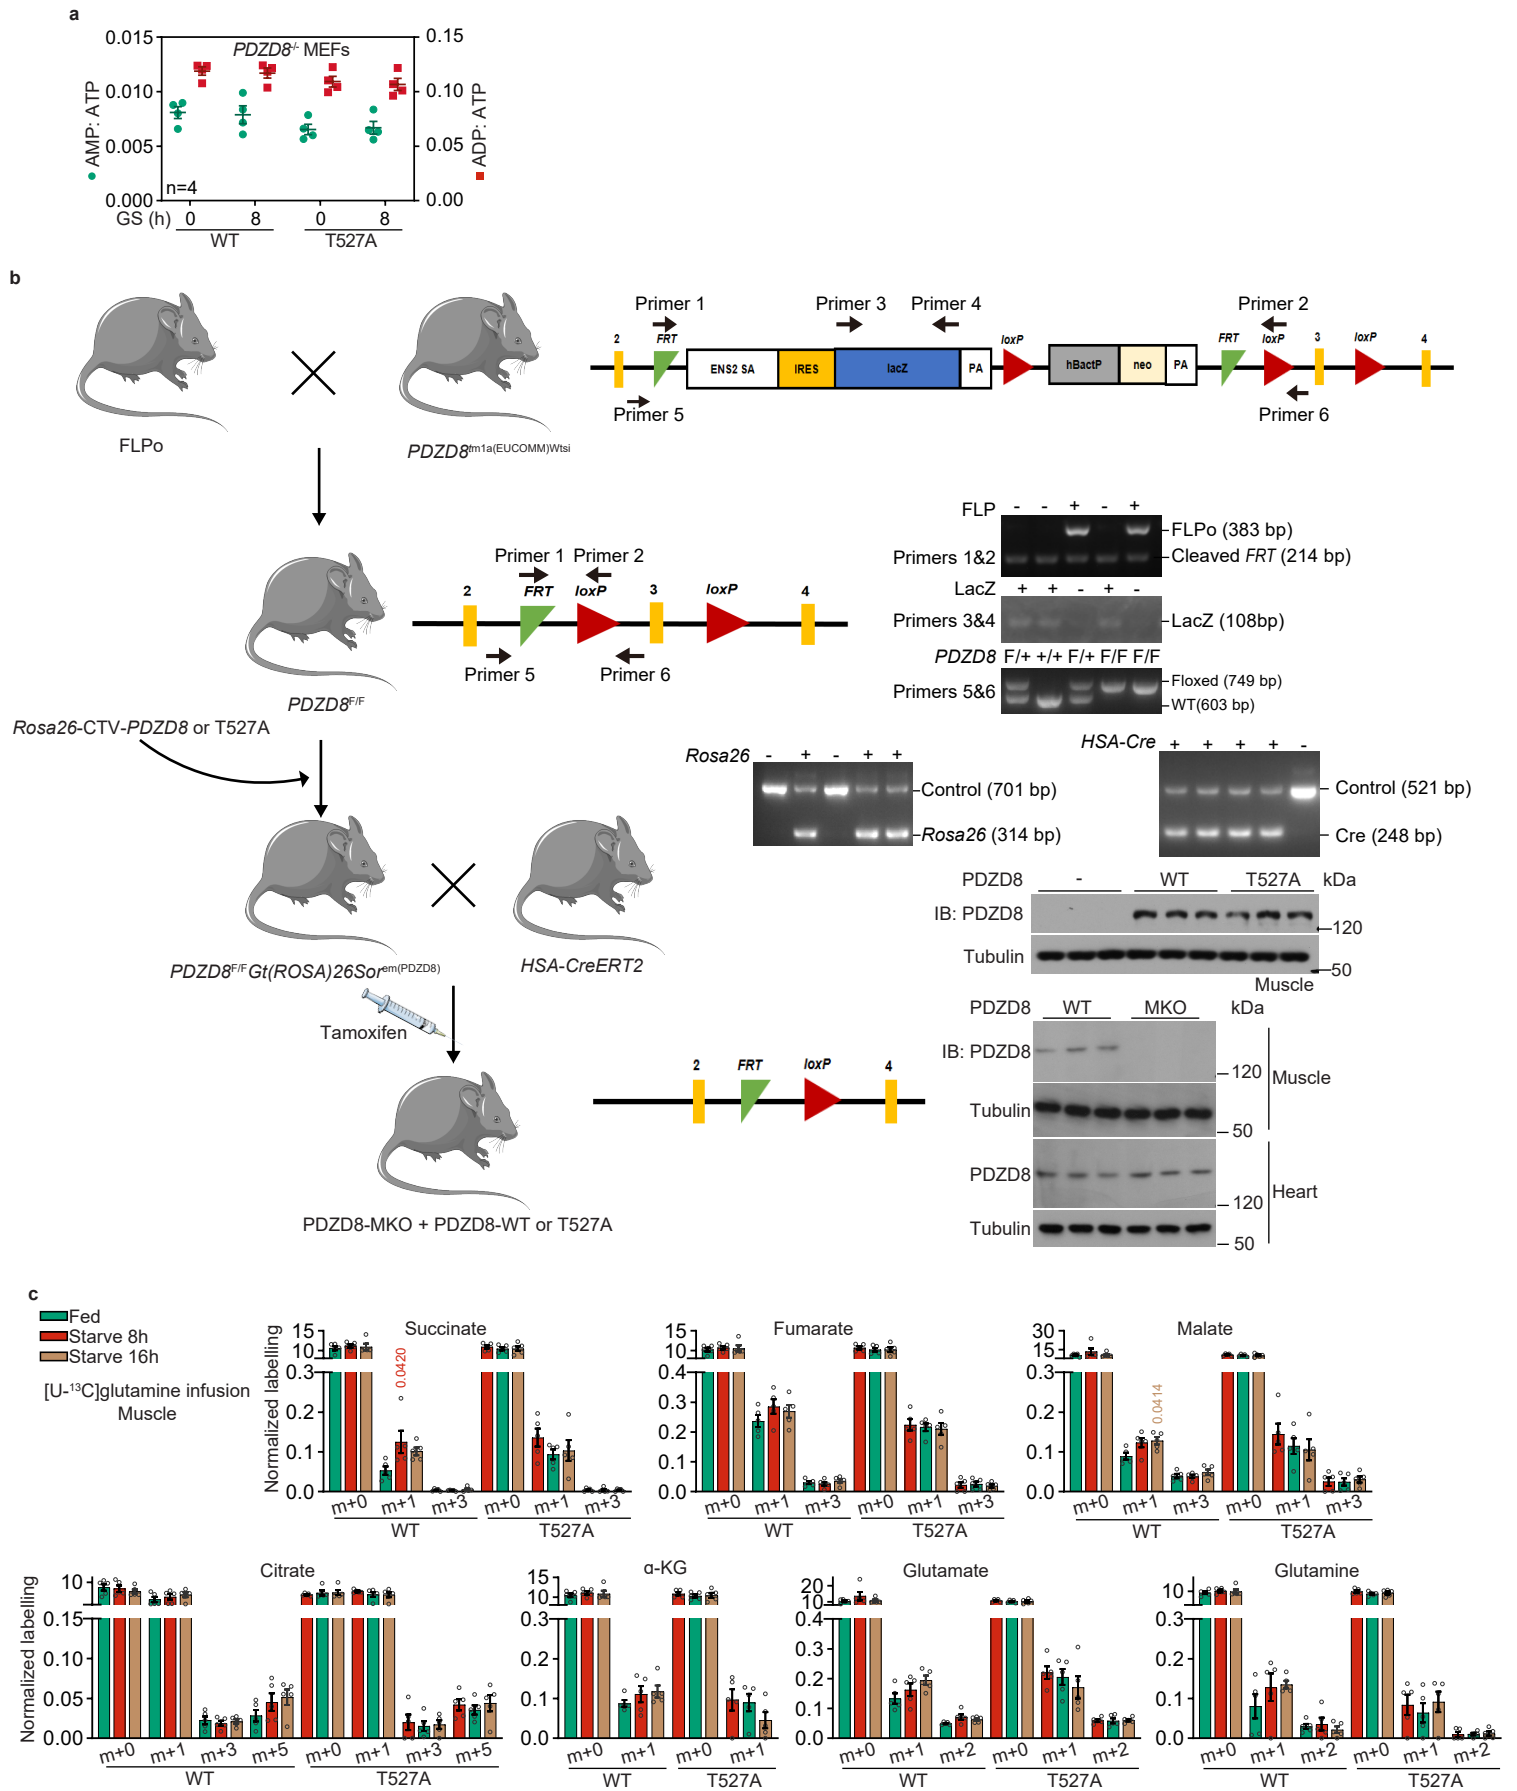

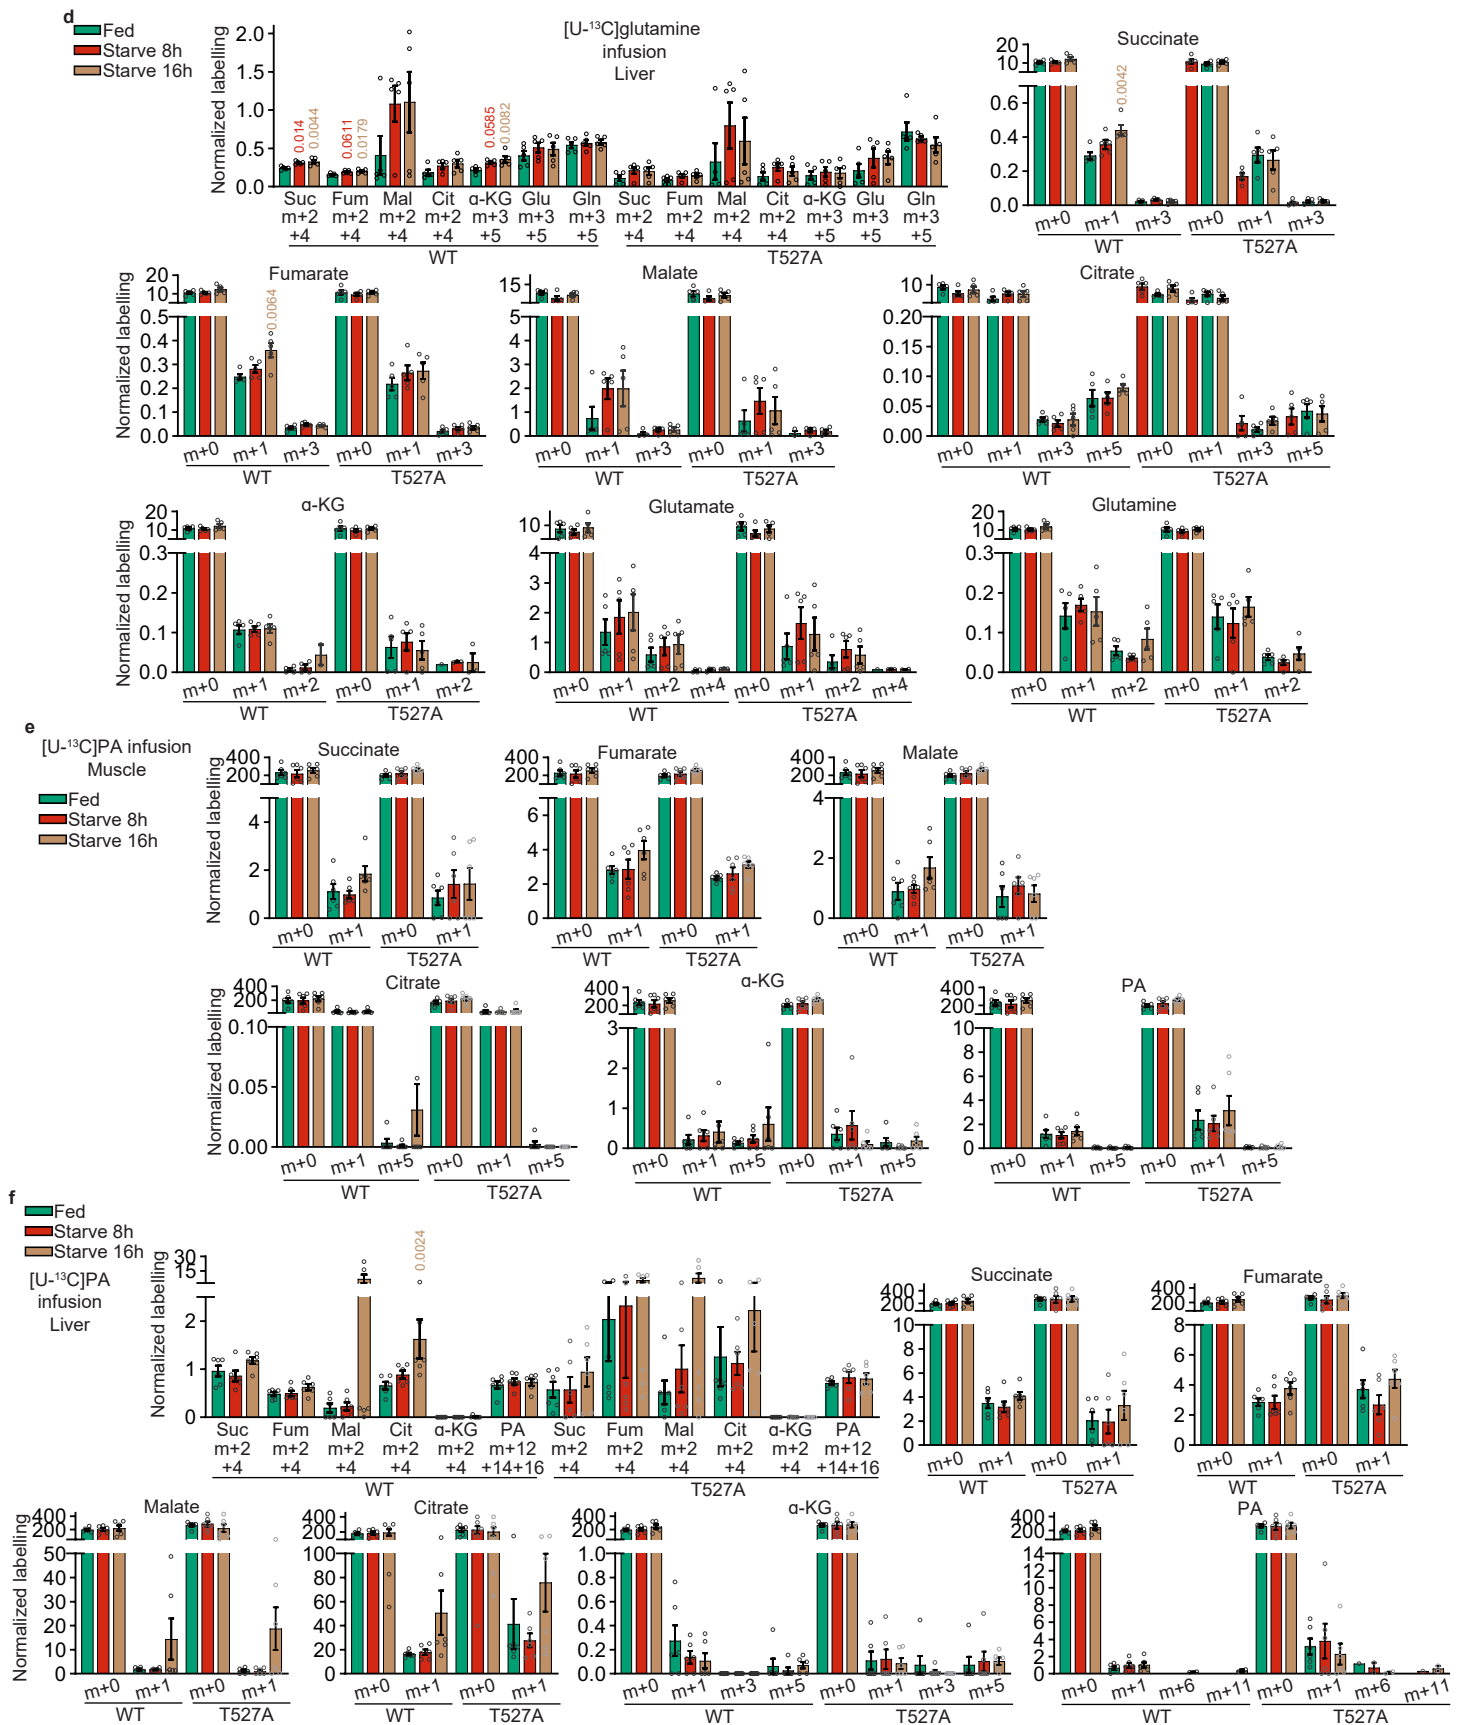

Supplementary information, Fig. S6 (cont.)

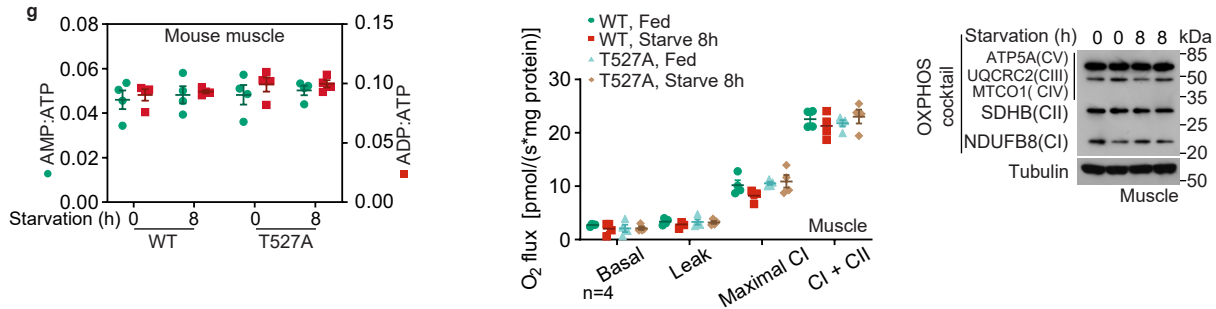

**Supplementary information Fig. S6 PDZD8 depends on AMPK to promote glutaminolysis in muscle tissues**

**a, g** Enhanced glutaminolysis is not required for the maintenance of energy levels in low glucose. The *PDZD8*<sup>-/-</sup> MEFs with wildtype PDZD8 or PDZD8-T527A re-introduction (**a**), or the mice with muscular PDZD8 replaced with wildtype PDZD8 or PDZD8-T527A (**g**), were glucose-starved for 8 h (**a**) or fasted for 8 h (**g**), followed by determining the AMP:ATP and ADP:ATP ratios by CE-MS (**g**, left) and the efficiency of the mitochondrial electron transport chain (**g**, right); as in Supplementary information Fig. S3g). Data are shown as mean ± SEM; n = 4 for each condition; p values were determined by one-way ANOVA, followed by Tukey (**a**, left panel of **g**) or two-way ANOVA, followed by Tukey (**g**, right).

**b** Validation of mice with muscular PDZD8 replaced with wildtype PDZD8 or PDZD8-T527A. The *PDZD8*<sup>fl/fl</sup> mice, generated through breeding the *PDZD8*-KO-first mice (*Pdzd8*<sup>tm1a(EUCOMM)Wisc</sup>) with the FLPo mice (to remove the FRT-flanked Stop element ahead of the *PDZD8* locus), were validated through: a) determining FRT cleavage (the “cleaved FRT” band; genotyped through using Primers #1 and #2); and b) determining the LacZ (of the Stop element) removal (genotyped through using Primers #3 and #4). See also the genotyping results for determining the existence of FLPo. The floxed *PDZD8* was then validated through genotyping using Primers #5 and #6. After introducing the *PDZD8* and *PDZD8*-T527A into the *PDZD8*<sup>fl/fl</sup> mice through the *Rosa26*-LSL system (see “Mouse strains” of Methods section; validated by genotyping the *ROSA26* sequence), mice were bred with *HSA-CreERT2* mice (validated by genotyping the *HSA-Cre* sequence). The muscle-specific expression of *PDZD8* was then induced by tamoxifen injection, followed by validation through immunoblotting. See also primer sequences and PCR programs used for genotyping in the “Mouse strains” of the Methods section.

**c-f** Levels of other isotopomers of the labeled TCA cycle intermediates shown in Fig. 5a (**c**; see also **d** for the rates of hepatic glutaminolysis), 5b (**e**; see also **f** for the rates of hepatic FAO). Data are shown as mean ± SEM; n = 5 (**c, d**), or 6 (**e, f**) biological replicates for each condition. p values were determined by one-way ANOVA, followed by a) Dunn: malate (m+0) and glutamate (m+0) of WT mice in **c**, citrate (m+0 and m+1) of T527A mice in **c**, glutamate (m+2 and m+4) of WT mice in **d**, α-KG (m+2) of T527A mice in **d**, PA (m+1), α-KG (m+5) and citrate (m+1 and m+5) of WT mice in **e**, citrate (m+1 and m+5) and α-KG (m+5) of T527A mice in **e**, citrate (m+1 and m+2+4), malate (m+1 and m+2+4), α-KG (m+2+4) and PA (m+6 and m+11) of WT mice in **f**, and malate (m+1 and m+2+4), citrate (m+2+4), α-KG (m+2+4) and PA (m+6 and m+11) of T527A mice in **f**; b) Sidak: citrate (m+3 and m+5) of T527A mice in **c**, succinate (m+2+4), fumarate (m+2+4), malate (m+2+4), glutamate (m+3+5), glutamine (m+3+5) and α-KG (m+3+5) of WT mice in **d**, succinate (m+2+4), fumarate (m+2+4), malate (m+2+4), glutamate (m+3+5) and α-KG (m+3+5) of T527A mice in **d**, succinate (m+2+4), fumarate (m+2+4) and PA (m+12+14+16) of WT mice in **f**, and fumarate (m+2+4) of T527A mice in **f**; and c) Tukey: for others.

Experiments in this figure were performed three times.
