# Supplementary material for: AMPK targets PDZD8 to trigger carbon source shift from glucose to glutamine
Source: PubMed Central journal article supplement (PMC11442470; doi:10.1038/s41422-024-00985-6), 2024-06-19
Supplement: 41422_2024_985_MOESM11_ESM.pdf [file 41422_2024_985_MOESM11_ESM.pdf]

Supplementary information, Table S3. Summary of lifespan analysis in mice<sup>a,b</sup>

| Genotypes/<br>treatments            | Mean life span (hours)          |                         |                | Median life span (hours)        |                         |             | N <sup>c</sup> | N <sup>d</sup> | N <sup>e</sup> | P-value Vs<br>saline control<br>within each<br>genotype<br>(Mantel-CoX) |
|-------------------------------------|---------------------------------|-------------------------|----------------|---------------------------------|-------------------------|-------------|----------------|----------------|----------------|-------------------------------------------------------------------------|
|                                     | Estimated life<br>span ± s.e.m. | 95% confidence interval |                | Estimated life<br>span ± s.e.m. | 95% confidence interval |             |                |                |                |                                                                         |
|                                     |                                 | Lower<br>bound          | Upper<br>bound |                                 | Lower bound             | Upper bound |                |                |                |                                                                         |
| <b>Fig. 5h</b>                      |                                 |                         |                |                                 |                         |             |                |                |                |                                                                         |
| <i>PDZD8</i> -Macrophage KO + WT    | 57.417 ± 5.391                  | 46.850                  | 67.984         | 36.000 ± 1.386                  | 33.284                  | 38.716      | 36             | 12             | 48             | N/A                                                                     |
| <i>PDZD8</i> -Macrophage KO + T527A | 73.429 ± 6.375                  | 60.934                  | 85.923         | 50.000 ± 17.262                 | 16.166                  | 83.834      | 24             | 18             | 42             | 0.066                                                                   |
| <b>Fig. 5j (left)</b>               |                                 |                         |                |                                 |                         |             |                |                |                |                                                                         |
| Saline                              | 57.034 ± 5.364                  | 46.522                  | 67.547         | 34.000 ± 2.283                  | 29.525                  | 38.475      | 42             | 16             | 58             | N/A                                                                     |
| BPTES                               | 72.762 ± 5.432                  | 62.116                  | 83.408         | 48.000 ± 12.883                 | 22.749                  | 73.251      | 32             | 28             | 60             | 0.028                                                                   |
| <b>Fig. 5j (right)</b>              |                                 |                         |                |                                 |                         |             |                |                |                |                                                                         |
| Saline                              | 59.804 ± 5.776                  | 48.482                  | 71.126         | 36.000 ± 1.777                  | 32.518                  | 39.482      | 35             | 16             | 51             | N/A                                                                     |
| Compound 968                        | 74.043 ± 5.815                  | 62.647                  | 85.440         | 58.000 ± 6.776                  | 44.719                  | 71.281      | 28             | 18             | 46             | 0.093                                                                   |
| <b>Fig. 5k</b>                      |                                 |                         |                |                                 |                         |             |                |                |                |                                                                         |
| Saline                              | 47.366 ± 6.475                  | 34.676                  | 60.056         | 24.000 ± 1.052                  | 21.939                  | 26.061      | 31             | 10             | 41             | N/A                                                                     |
| BPTES                               | 56.244 ± 6.843                  | 42.832                  | 69.656         | 30.000 ± 3.832                  | 22.490                  | 37.510      | 28             | 13             | 41             | 0.065                                                                   |
| Aldometanib + BPTES                 | 69.783 ± 6.307                  | 57.422                  | 82.144         | 48.000 ± 9.009                  | 30.343                  | 65.657      | 27             | 19             | 46             | 0.002                                                                   |

<sup>a</sup>Independent repeats of each lifespan experiment were performed. Data from representative experiments are shown.

<sup>b</sup>Lifespan data sets within each panel of this table were done in parallel and statistical analyses was done within the data set.

<sup>c</sup>Number of mice scored (death events).

<sup>d</sup>Number of mice censored.

<sup>e</sup>Total number of mice.
